# Supplementary material for: An adsorbate biased dynamic 3D porous framework for inverse CO2 sieving over C2H2
Source: Royal Society of Chemistry journal article supplement (doi:10.1039/d3sc06611h), 2024-01-01
Supplement: d3sc06611h1.pdf [file d3sc06611h1.pdf]

## Supporting Information

# **An Adsorbate Biased Dynamic 3D Porous Framework for Inverse CO<sub>2</sub> Sieving over C<sub>2</sub>H<sub>2</sub>**

Nivedita Sikdar<sup>a,b,‡</sup>, Subhajit Laha<sup>a,‡</sup>, Rohan Jena<sup>a</sup>, Anupam Dey<sup>a</sup>, Faruk Ahamed Rahimi<sup>a</sup>  
and Tapas Kumar Maji<sup>a\*</sup>

<sup>a</sup> Molecular Materials Laboratory, Chemistry and Physics of Materials Unit, School of Advanced Materials (SAMat), Jawaharlal Nehru Centre for Advanced Scientific Research (JNCASR), Jakkur, Bangalore, 560064, India.

<sup>b</sup> Present Address: Department of Chemistry, School of Science, Gandhi Institute of Technology and Management (GITAM), Hyderabad 502329, India

<sup>‡</sup> Authors contributed equally

E-mail: [tmaji@jncasr.ac.in](mailto:tmaji@jncasr.ac.in)

## Experimental section

### Materials

All the reagents employed are commercially available and used as provided without further purification.  $\text{Ni}(\text{NO}_3)_2 \cdot 6\text{H}_2\text{O}$  has been obtained from Spectrochem. 1,4-naphthalele dicarboxylic acid (1,4- $\text{H}_2\text{ndc}$ ), KOH were obtained from Alfa Aeser.

### Synthesis

A mixture containing  $\text{Ni}(\text{NO}_3)_2 \cdot 6\text{H}_2\text{O}$  (0.5 mmol, 0.145 g), 1,4- $\text{H}_2\text{ndc}$  (0.5 mmol, 0.108 g) and KOH (1.0 mmol, 0.056 g) is suspended in teflon bomb containing 10 mL water and stirred for 30 mins. The solution was then heated at 180 °C for a period of 10 days. The dark green colored block-shaped crystals of **1** were then collected and further washed in water for several times. Yield: 80 % (with respect to metal). Anal. Calc. for  $\text{C}_{36}\text{O}_{19}\text{Ni}_4\text{H}_{18}$  C: 43.711; H: 1.83; Found C: 44.98; H: 2.01. FT-IR (KBr pellet, 4000–400  $\text{cm}^{-1}$ ): 3444 (br), 1610 (s), 1590 (w), 1412 (s).

### Physical measurements

Elemental analyses are carried out using a Thermo Fischer Flash 2000 Elemental Analyzer. FT-IR spectra are recorded on a Bruker IFS 66v/S spectrophotometer using KBr pellets in the region 4000-400  $\text{cm}^{-1}$ . The in-situ DRIFTS measurements were carried out using an FT-IR spectrophotometer (BRUKER, Vertex 70B) within a removable sample compartment using an MCT detector. The 10 mg of activated sample or **1'** was evenly coated on the glass disc of 1 cm diameter and placed inside the evacuable/purgeable sample compartment for monitoring reaction progress of by increasing  $\text{CO}_2$  (99.995 %) pressure inside the sample chamber in a regular manner. Similar procedure has been followed by only allowing  $\text{CO}_2$  gas inside the chamber in absence of the sample as a control study. All the signals were collected through MCT detector with 4  $\text{cm}^{-1}$  resolution and 64 scans at a regular time interval. At first, the molecular  $\text{CO}_2$  peaks are identified by dosing  $\text{CO}_2$  in the chamber with increasing flow through MFC (mass flow controller). Next, the MOF peak has been identified by keeping the sample coted disc after releasing  $\text{CO}_2$  from the chamber. Finally, the exclusive spectra appeared and increased from  $\text{CO}_2$ -interacted MOF by dosing  $\text{CO}_2$  in higher flow in the chamber. These peaks are recorded with regular intervals and analysed over the solo MOF and molecular  $\text{CO}_2$  peaks appeared after infrared radiation. Thermogravimetric analyses (TGA) are carried out (Metler Toledo) in nitrogen atmosphere in the temperature range of 30–700 °C (heating rate 5 °C  $\text{min}^{-1}$ ). The powder XRD pattern of the compounds has been recorded by using Cu- $\text{K}\alpha$  radiation

(Bruker D8 Discover; 40 kV, 30 mA). The patterns have been agreed with those calculated from single crystal structure determination.

### X-ray crystallography

X-ray single-crystal structure data of **1** has been collected on a Bruker Smart-CCD diffractometer equipped with a normal focus, 2.4 kW sealed tube X-ray source with graphite monochromated Mo-K $\alpha$  radiation ( $\lambda = 0.71073 \text{ \AA}$ ) operating at 50 kV and 30 mA. The program SAINT<sup>1</sup> is used for the integration of diffraction profiles and absorption correction was made with SADABS<sup>2</sup> program. All the structures are solved by SIR92<sup>3</sup> and refined by full-matrix least-squares method using SHELXL-97.<sup>4</sup> All the hydrogen atoms are fixed by HFIX and placed in ideal positions. Potential solvent accessible area or void space is calculated using the PLATON multipurpose crystallographic software. All the crystallographic and structure refinement data of **1** are summarized in **Table S1**. Selected bond lengths and angles for **1** are given in **Table S2-3**, respectively. All calculations were carried out using SHELXS 97,<sup>5</sup> PLATON,<sup>6</sup> and WinGX system, Ver 1.80.05.

**Table S1** Crystal data and structure refinement parameters of **1**.

| Parameters                                    |                                                                 |
|-----------------------------------------------|-----------------------------------------------------------------|
| Empirical Formula                             | C <sub>36</sub> O <sub>19</sub> Ni <sub>4</sub> H <sub>18</sub> |
| Formula weight                                | 989.26                                                          |
| Crystal system                                | Triclinic                                                       |
| Space group                                   | <i>P</i> $\bar{1}$                                              |
| <i>a</i> , Å                                  | 7.0744(1)                                                       |
| <i>b</i> , Å                                  | 13.6038(3)                                                      |
| <i>c</i> , Å                                  | 20.6602(4)                                                      |
| $\alpha$ , deg                                | 98.903(1)                                                       |
| $\beta$ , deg                                 | 96.002(1)                                                       |
| $\gamma$ , deg                                | 101.590(1)                                                      |
| <i>V</i> , Å <sup>3</sup>                     | 1905.31(6)                                                      |
| <i>Z</i>                                      | 2                                                               |
| <i>T</i> , K                                  | 298                                                             |
| $\mu$ , mm <sup>-1</sup>                      | 2.028                                                           |
| <i>D</i> <sub>calcd</sub> , g/cm <sup>3</sup> | 1.724                                                           |
| <i>F</i> (000)                                | 996                                                             |

|                              |         |
|------------------------------|---------|
| Total reflections            | 114743  |
| Unique reflections           | 14547   |
| $\lambda(\text{Mo-K}\alpha)$ | 0.71073 |
| $R_{\text{int}}$             | 0.079   |
| GOF on $F^2$                 | 1.06    |
| $R_1[I > 2\sigma(I)]^a$      | 0.0410  |
| $R_w[\text{all data}]^b$     | 0.1236  |

$$^a R = \Sigma ||F_o| - |F_c|| / \Sigma |F_o|. \quad ^b R_w = [\Sigma \{w(F_o^2 - F_c^2)^2\} / \Sigma \{w(F_o^2)^2\}]^{1/2}.$$

**Table S2** Selected bond lengths (Å) for **1**.

|         |            |         |            |
|---------|------------|---------|------------|
| Ni1-O13 | 1.9853(14) | Ni1-O5  | 2.0073(15) |
| Ni1-O11 | 2.0966(15) | Ni1-O8  | 2.1047(15) |
| Ni1-O14 | 2.1639(16) | Ni2-O15 | 2.0222(14) |
| Ni2-O13 | 2.0376(15) | Ni2-O6  | 2.0377(15) |
| Ni2-O12 | 2.0422(15) | Ni2-O2  | 2.0661(15) |
| Ni2-O14 | 2.1914(17) | Ni3-O15 | 2.0125(15) |
| Ni3-O13 | 2.0189(14) | Ni3-O3  | 2.0360(16) |
| Ni3-O7  | 2.0552(15) | Ni3-O9  | 2.0675(15) |
| Ni3-O16 | 2.2103(16) | Ni4-O15 | 1.9740(14) |
| Ni4-O10 | 1.9888(15) | Ni4-O4  | 2.0345(16) |
| Ni4-O8  | 2.0694(15) | Ni4-O11 | 2.1409(15) |
| Ni4-O16 | 2.1852(16) | Ni1-O1  | 2.0319(16) |

**Table S3** Selected bond angles (°) for **1**.

|             |           |             |           |             |           |
|-------------|-----------|-------------|-----------|-------------|-----------|
| O13-Ni1-O5  | 101.87(6) | O13-Ni1-O1  | 90.06(6)  | O5-Ni1-O1   | 93.97(7)  |
| O13-Ni1-O11 | 85.72(6)  | O5-Ni1-O11  | 168.19(7) | O1-Ni1-O11  | 95.07(6)  |
| O13-Ni1-O8  | 94.13(6)  | O5-Ni1-O8   | 86.85(6)  | O1-Ni1-O8   | 175.48(6) |
| O11-Ni1-O8  | 83.55(6)  | O13-Ni1-O14 | 173.75(6) | O5-Ni1-O14  | 83.78(6)  |
| O1-Ni1-O14  | 86.84(6)  | O11-Ni1-O14 | 89.14(6)  | O8-Ni1-O14  | 88.83(6)  |
| O15-Ni2-O13 | 81.38(6)  | O15-Ni2-O6  | 86.72(6)  | O13-Ni2-O6  | 100.06(6) |
| O15-Ni2-O12 | 92.30(6)  | O13-Ni2-O12 | 89.85(6)  | O6-Ni2-O12  | 169.76(7) |
| O15-Ni2-O2  | 174.46(6) | O13-Ni2-O2  | 93.34(6)  | O6-Ni2-O2   | 95.89(7)  |
| O12-Ni2-O2  | 85.99(6)  | O15-Ni2-O14 | 93.23(6)  | O13-Ni2-O14 | 173.82(6) |
| O6-Ni2-O14  | 82.55(6)  | O12-Ni2-O14 | 87.34(7)  | O2-Ni2-O14  | 91.95(6)  |
| O15-Ni3-O13 | 82.08(6)  | O15-Ni3-O3  | 94.45(6)  | O13-Ni3-O3  | 176.45(6) |

|             |           |              |           |             |           |
|-------------|-----------|--------------|-----------|-------------|-----------|
| O15-Ni3-O7  | 91.13(6)  | O13-Ni3-O7   | 92.83(6)  | O3-Ni3-O7   | 86.46(7)  |
| O15-Ni3-O9  | 102.05(6) | O13-Ni3-O9   | 89.83(6)  | O3-Ni3-O9   | 91.64(7)  |
| O7-Ni3 -O9  | 166.79(7) | O15-Ni3-O16  | 175.34(6) | O13-Ni3-O16 | 93.57(6)  |
| O3-Ni3-O16  | 89.88(6)  | O7-Ni3-O16   | 87.42(6)  | O9-Ni3-O16  | 79.50(6)  |
| O15-Ni4-O10 | 102.92(6) | O15-Ni4-O4   | 91.23(6)  | O10-Ni4-O4  | 92.82(7)  |
| O15-Ni4-O8  | 85.65(6)  | O10-Ni4-O8   | 167.28(6) | O4-Ni4-O8   | 96.41(6)  |
| O15-Ni4-O11 | 93.76(6)  | O10-Ni4 -O11 | 86.72(6)  | O4-Ni4-O11  | 174.96(6) |
| O8-Ni4-O11  | 83.32(6)  | O15-Ni4-O16  | 172.65(6) | O10-Ni4-O16 | 84.15(6)  |
| O4-Ni4-O16  | 86.38(6)  | O8-Ni4-O16   | 87.72(6)  | O11-Ni4-O16 | 88.59(6)  |

**Table S4** Comparison of cell parameters at different states: (**1'** is indexed using TOPAS Programme and rehydrated **1** by Fullprof software). Change in respective crystal structures transforming from as-synthesized to desolvated to rehydrated MOFs.

|                                              | <i>a</i> (Å)    | <i>b</i> (Å) | <i>c</i> (Å) | $\alpha$ (°) | $\beta$ (°) | $\gamma$ (°) | <i>V</i> (Å <sup>3</sup> ) | lattice      |
|----------------------------------------------|-----------------|--------------|--------------|--------------|-------------|--------------|----------------------------|--------------|
|                                              | Cell parameters |              |              |              |             |              |                            |              |
| As-synthesized ( <b>1</b> )/ Open-pore phase | 7.07440         | 13.6038      | 20.6602      | 98.9030      | 96.0020     | 101.5900     | 1905.31                    | Triclinic    |
| Desolvated <b>1'</b>                         | 20.4495         | 9.7947       | 8.9130       | 90           | 90          | 90           | 1785.23                    | Orthorhombic |
| Rehydrated <b>1</b>                          | 7.081           | 13.802       | 20.864       | 98.486       | 96.655      | 101.691      | 1952.52                    | Triclinic    |

**Table S5** List of atomic coordinates for the MOF **1** (Extracted from CIF file).

| Atoms | X           | Y           | Z          |
|-------|-------------|-------------|------------|
| Ni1   | -0.03780(4) | 0.64442(2)  | 0.78876(2) |
| Ni2   | 0.43189(4)  | 0.65325(2)  | 0.78674(2) |
| Ni3   | 0.17855(4)  | 0.43885(2)  | 0.73715(2) |
| Ni4   | 0.64199(4)  | 0.44476(2)  | 0.73276(2) |
| O1    | 0.0628(2)   | 0.78054(12) | 0.76152(8) |
| O2    | 0.3871(2)   | 0.79880(12) | 0.78712(8) |
| O3    | 0.2172(2)   | 1.29433(12) | 0.73612(8) |
| O4    | 0.5413(2)   | 1.30797(12) | 0.75940(8) |
| O5    | 0.1034(2)   | 0.68897(13) | 0.88144(7) |
| O6    | 0.3970(2)   | 0.65037(13) | 0.88314(7) |
| O7    | -0.0895(2)  | 0.56852(13) | 1.17183(7) |

|     |            |             |             |
|-----|------------|-------------|-------------|
| O8  | 0.1627(2)  | 0.49291(11) | 1.18208(7)  |
| O9  | 0.2028(2)  | 0.42838(13) | 0.63758(7)  |
| O10 | 0.5027(2)  | 0.39820(13) | 0.64097(7)  |
| O11 | 0.2320(2)  | 0.41685(11) | 0.29860(7)  |
| O12 | 0.4812(2)  | 0.33819(13) | 0.30381(7)  |
| O13 | 0.1560(2)  | 0.58533(11) | 0.74194(7)  |
| O14 | -0.2617(2) | 0.71193(12) | 0.82946(8)  |
| O15 | 0.4527(2)  | 0.50597(11) | 0.77968(7)  |
| O16 | 0.8707(2)  | 0.37691(12) | 0.69338(8)  |
| C1  | 0.2379(3)  | 0.83041(16) | 0.77015(10) |
| C2  | 0.2698(3)  | 0.93974(16) | 0.76065(11) |
| C3  | 0.3910(4)  | 1.01310(18) | 0.80854(12) |
| H3  | 0.453681   | 0.993704    | 0.844767    |
| C4  | 0.4223(4)  | 1.11678(17) | 0.80390(12) |
| H4  | 0.504599   | 1.165234    | 0.837035    |
| C5  | 0.3325(3)  | 1.14689(16) | 0.75101(11) |
| C6  | 0.2101(3)  | 1.07333(16) | 0.69865(11) |
| C7  | 0.1773(3)  | 0.96775(16) | 0.70386(11) |
| C8  | 0.0593(4)  | 0.89545(18) | 0.65041(12) |
| H8  | 0.034986   | 0.826505    | 0.653003    |
| C9  | -0.0189(5) | 0.9253(2)   | 0.59540(13) |
| H9  | -0.09493   | 0.876529    | 0.560995    |
| C10 | 0.0143(5)  | 1.0285(2)   | 0.59038(13) |
| H10 | -0.039805  | 1.048011    | 0.552711    |
| C11 | 0.1262(4)  | 1.10103(19) | 0.64060(12) |
| H11 | 0.147444   | 1.169418    | 0.636622    |
| C12 | 0.3662(3)  | 1.25973(15) | 0.74885(10) |
| C13 | 0.2517(3)  | 0.66670(16) | 0.90957(10) |
| C14 | 0.2433(3)  | 0.65200(17) | 0.98012(10) |
| C15 | 0.2784(4)  | 0.56354(19) | 0.99644(11) |
| H15 | 0.334478   | 0.521761    | 0.967842    |
| C16 | 0.2305(4)  | 0.53485(18) | 1.05638(11) |
| H16 | 0.259051   | 0.475297    | 1.067609    |
| C17 | 0.1420(3)  | 0.59394(16) | 1.09852(10) |
| C18 | 0.1190(3)  | 0.69135(17) | 1.08567(10) |
| C19 | 0.1749(4)  | 0.72168(17) | 1.02603(10) |
| C20 | 0.1651(5)  | 0.8208(2)   | 1.01542(13) |
| H20 | 0.200536   | 0.841174    | 0.976615    |
| C21 | 0.1051(6)  | 0.8868(2)   | 1.06064(14) |
| H21 | 0.104327   | 0.952461    | 1.053298    |
| C22 | 0.0439(5)  | 0.8567(2)   | 1.11865(14) |
| H22 | -0.000403  | 0.901873    | 1.148867    |
| C23 | 0.0494(4)  | 0.76174(19) | 1.13057(12) |
| H23 | 0.00687    | 0.742348    | 1.168768    |
| C24 | 0.0653(3)  | 0.55046(15) | 1.15500(9)  |
| C25 | 0.3415(3)  | 0.40257(16) | 0.61105(10) |
| C26 | 0.3201(3)  | 0.37851(17) | 0.53658(10) |
| C27 | 0.2330(4)  | 0.43875(19) | 0.50201(10) |

|     |             |             |             |
|-----|-------------|-------------|-------------|
| H27 | 0.17095     | 0.485418    | 0.523897    |
| C28 | 0.2361(4)   | 0.43094(19) | 0.43311(10) |
| H28 | 0.176656    | 0.473011    | 0.410314    |
| C29 | 0.3254(3)   | 0.36229(16) | 0.39920(10) |
| C30 | 0.4060(3)   | 0.29224(17) | 0.43287(10) |
| C31 | 0.4016(3)   | 0.30073(17) | 0.50271(10) |
| C32 | 0.4720(4)   | 0.2280(2)   | 0.53564(12) |
| H32 | 0.471297    | 0.232978    | 0.581011    |
| C33 | 0.5402(5)   | 0.1514(2)   | 0.50215(13) |
| H33 | 0.584189    | 0.104291    | 0.524619    |
| C34 | 0.5446(5)   | 0.1431(2)   | 0.43410(13) |
| H34 | 0.591671    | 0.090479    | 0.411593    |
| C35 | 0.4803(4)   | 0.21162(19) | 0.40024(12) |
| H35 | 0.485355    | 0.205219    | 0.355019    |
| C36 | 0.3482(3)   | 0.37120(16) | 0.32883(9)  |
| Ni1 | 0.96220(4)  | 0.64442(2)  | 0.78876(2)  |
| Ni1 | 0.03780(4)  | 0.35558(2)  | 0.21124(2)  |
| Ni1 | 0.03780(4)  | 0.35558(2)  | 1.21124(2)  |
| Ni2 | -0.56811(4) | 0.65325(2)  | 0.78674(2)  |
| Ni2 | 0.56811(4)  | 0.34675(2)  | 0.21326(2)  |
| Ni3 | 0.17855(4)  | 1.43885(2)  | 0.73715(2)  |
| Ni3 | 1.17855(4)  | 0.43885(2)  | 0.73715(2)  |
| Ni3 | -0.17855(4) | 0.56115(2)  | 1.26285(2)  |
| Ni4 | -0.35801(4) | 0.44476(2)  | 0.73276(2)  |
| Ni4 | 0.64199(4)  | 1.44476(2)  | 0.73276(2)  |
| Ni4 | 0.35801(4)  | 0.55524(2)  | 0.26724(2)  |
| Ni4 | 0.35801(4)  | 0.55524(2)  | 1.26724(2)  |
| O3  | 0.2172(2)   | 0.29433(12) | 0.73612(8)  |
| O4  | 0.5413(2)   | 0.30797(12) | 0.75940(8)  |
| O7  | 0.0895(2)   | 0.43148(13) | 0.82817(7)  |
| O8  | -0.1627(2)  | 0.50709(11) | 0.81792(7)  |
| O8  | 0.8373(2)   | 0.50709(11) | 0.81792(7)  |
| O11 | -0.2320(2)  | 0.58315(11) | 0.70140(7)  |
| O11 | 0.7680(2)   | 0.58315(11) | 0.70140(7)  |
| O12 | 0.5188(2)   | 0.66181(13) | 0.69619(7)  |
| O14 | 0.7383(2)   | 0.71193(12) | 0.82946(8)  |
| O16 | -0.1293(2)  | 0.37691(12) | 0.69338(8)  |
| O17 | -0.2161(4)  | 0.89750(18) | 0.80080(15) |
| O18 | -0.2585(13) | 0.7371(10)  | 0.9656(6)   |
| O19 | 0.7591(4)   | 0.17817(19) | 0.68974(14) |

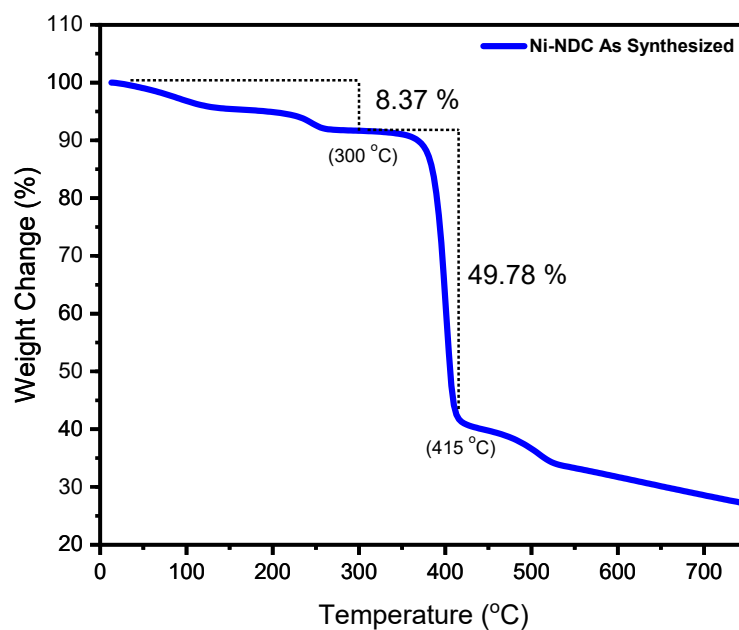

**Figure S1** Thermogravimetric analysis of Ni-NDC MOF.

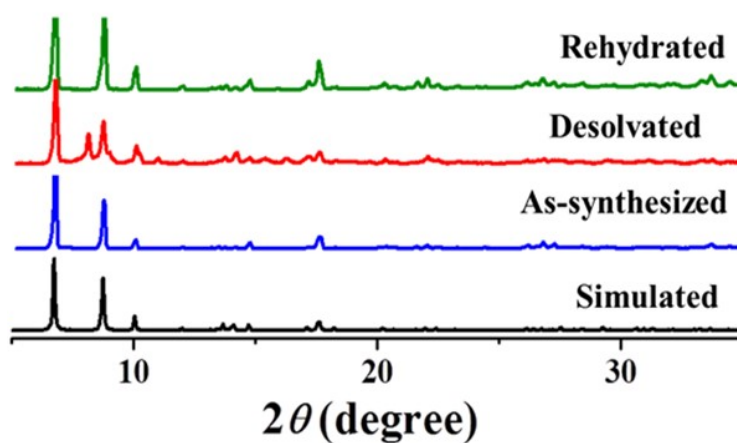

**Figure S2** PXRD pattern of **1** recorded at different states: (I) simulated (II) as-synthesized (III) desolvated **1'** (activated phase) (IV) rehydrated phase of **1'**.



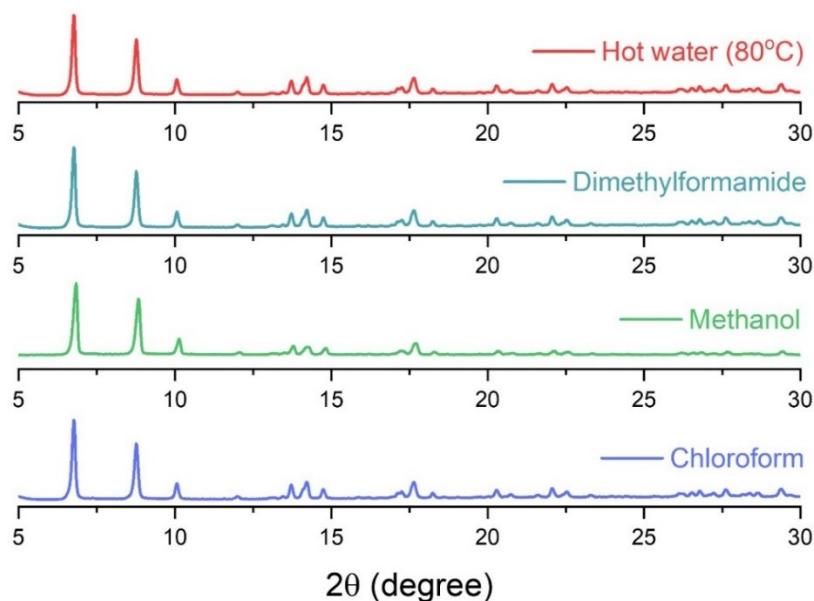

**Figure S3** PXRD patterns for Ni-NDC MOF showing stability after treatment with different solvents.

### Adsorption details

The adsorption isotherms of CO<sub>2</sub> (at 195, 273 and 298 K), N<sub>2</sub> (at 77 and 298 K), CH<sub>4</sub>, C<sub>2</sub>H<sub>2</sub>, C<sub>2</sub>H<sub>4</sub> and C<sub>2</sub>H<sub>6</sub> (at 298 and 273 K) of **1'** have been measured using AUTOSORB IQ2 instrument. The compound **1** has been activated at 195 °C under 1×10<sup>-1</sup> Pa vacuum for about 16 h prior to measurement of the isotherms. All the gases used for adsorption measurement are of scientific/research grade with 99.999% purity. Dead volume is measured with helium gas. The adsorbates are passed into the sample cells, and then the change of the pressure is monitored and the degree of adsorption is determined by the decrease in pressure at the equilibrium state. All operations are software defined and automatic. For diffusion, the relation of particle-vapor speed can be expressed by film thickness and diffusion coefficient. The graph represents  $(C - C_{e1}/C_{01} - C_{e1})$  vs time (sec), where  $C$  is the density of the adsorbate. Additionally,  $C_{e1}$ ,  $C_{01}$  are the gas phase density at equilibrium point and saturated vapor pressure by considering n-th (here we choose the 1<sup>st</sup> point where n=1) point at  $P/P_0$ . For measuring the adsorption rate from CO<sub>2</sub> adsorption, we choose the 2<sup>nd</sup> point and corresponding kinetic plot with LDF (linear driving force) fitting are as given Figure S6.<sup>7,8</sup>

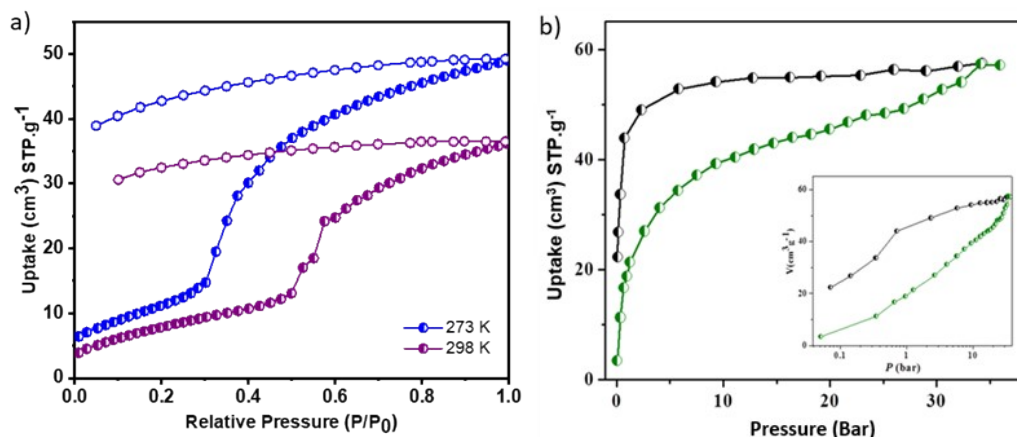

**Figure S4** (a) CO<sub>2</sub> adsorption isotherm of **1'** at 273 and 298 K, respectively, reports shifting in gate opening pressure upon changing measurement temperature. (b) High-pressure CO<sub>2</sub> adsorption isotherm at 273 (black) and 298 K (green, inset).

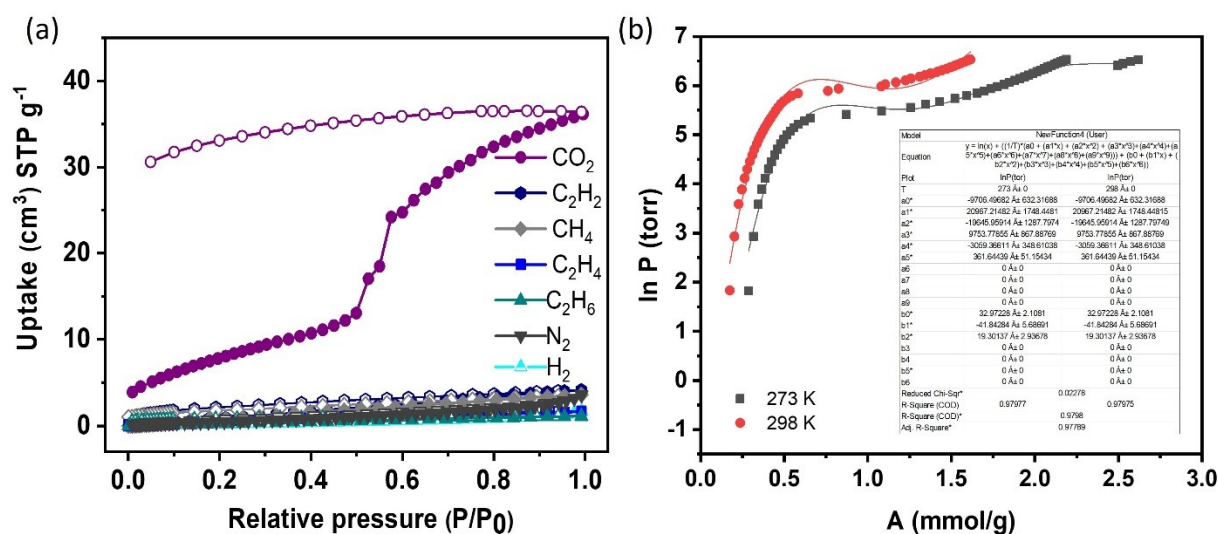

**Figure S5** (a) N<sub>2</sub>, H<sub>2</sub>, CO<sub>2</sub> and different hydrocarbon (CH<sub>4</sub>, C<sub>2</sub>H<sub>2</sub>, C<sub>2</sub>H<sub>4</sub>, C<sub>2</sub>H<sub>6</sub>) adsorption isotherms at 298 K for **1'**. (b) Virial fitting corresponding to figure 2c.

**Table S6** Physical parameters of selected gas and vapor adsorbate.<sup>9-11</sup>

|                               | Molecular dimension (Å) |      |      | Boiling point (K) | Polarizability×10 <sup>25</sup> cm <sup>3</sup> | Dipole moment×10 <sup>18</sup> esu cm | Quadruple moment×10 <sup>2</sup> esu cm <sup>2</sup> |
|-------------------------------|-------------------------|------|------|-------------------|-------------------------------------------------|---------------------------------------|------------------------------------------------------|
|                               | x                       | y    | z    |                   |                                                 |                                       |                                                      |
| CO <sub>2</sub>               | 3.18                    | 3.33 | 5.36 | 216.55            | 29.11                                           | 0.109                                 | 4.3                                                  |
| CH <sub>4</sub>               | 3.63                    | 3.98 | 3.98 | 111.66            | 25.93                                           | --                                    | --                                                   |
| C <sub>2</sub> H <sub>2</sub> | 3.32                    | 3.34 | 5.76 | 188.40            | 33.3-39.3                                       | --                                    | 4.71                                                 |
| C <sub>2</sub> H <sub>4</sub> | 3.28                    | 4.18 | 4.84 | 169.42            | 42.52                                           | --                                    | 1.5                                                  |
| C <sub>2</sub> H <sub>6</sub> | 3.81                    | 4.08 | 4.82 | 184.55            | 44.3-44.7                                       | 0.366                                 | 0.65                                                 |

The adsorption isotherms of different solvents (MeOH at 293 K and H<sub>2</sub>O at 298 K) for **1'** are measured in the vapor state by using a BELSORP-aqua3 volumetric adsorption instrument from BEL, Japan. All the samples of about ~100 mg is prepared by adopting a similar procedure mentioned earlier prior to measurement of the isotherms. The solvent molecules used to generate the vapor are degassed fully by repeated evacuation. Dead volume is measured with Helium gas. The adsorbate was placed into the sample cell, then the change of the pressure is monitored, and the degree of adsorption is determined by the decrease in pressure at the equilibrium state.

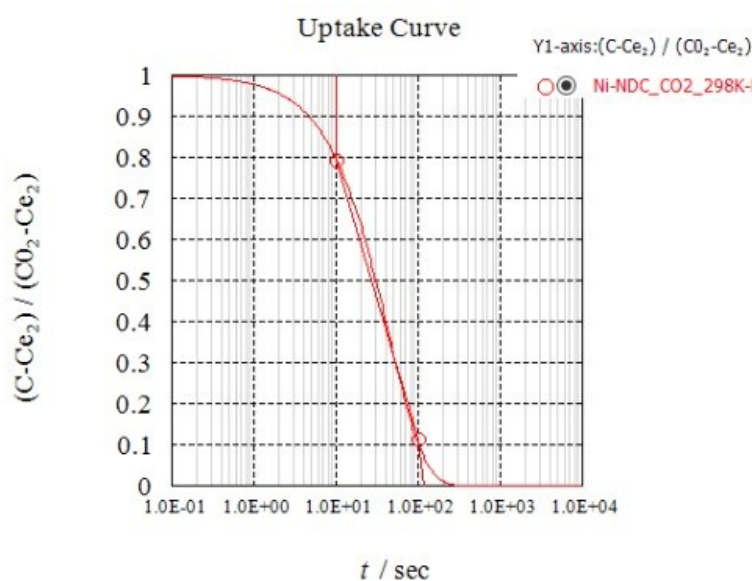**Figure S6** CO<sub>2</sub> kinetics measurement graph, showing LDF fitting and the corresponding rate contact value is  $k = 2.21 \times 10^{-2} \text{ s}^{-1}$ .

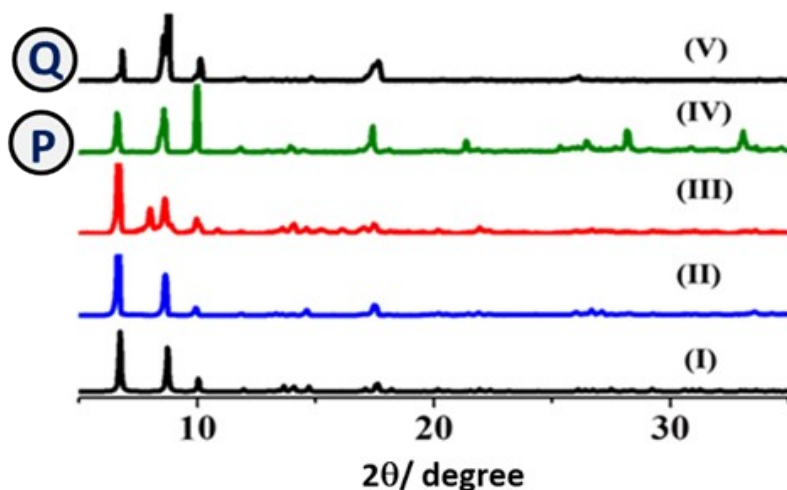

**Figure S7** The blue circle P, Q represents the point in Figure 2 (main text) where the PXRD has been recorded. PXRD patterns of **1** recorded at different states: (I) simulated (II) **1** (III) desolvated **1'** (IV) **1'** at P and (V) **1'** at Q.

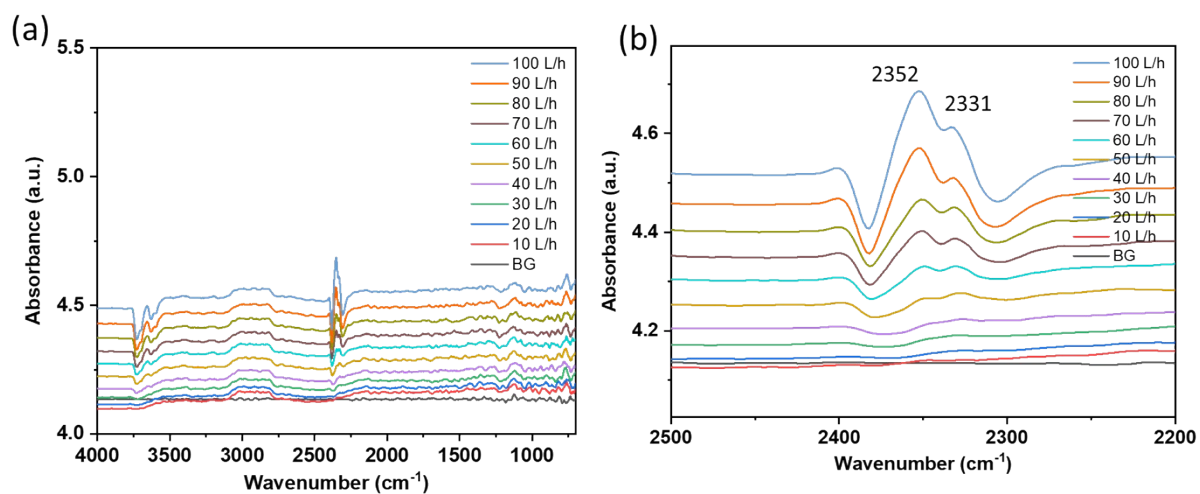

**Figure S8** *In-situ* DRIFTS of regulated increase of CO<sub>2</sub> flow rate inside the IR chamber in absence of the sample. The legend represents the flow in L/h of CO<sub>2</sub> dosed in regular interval.

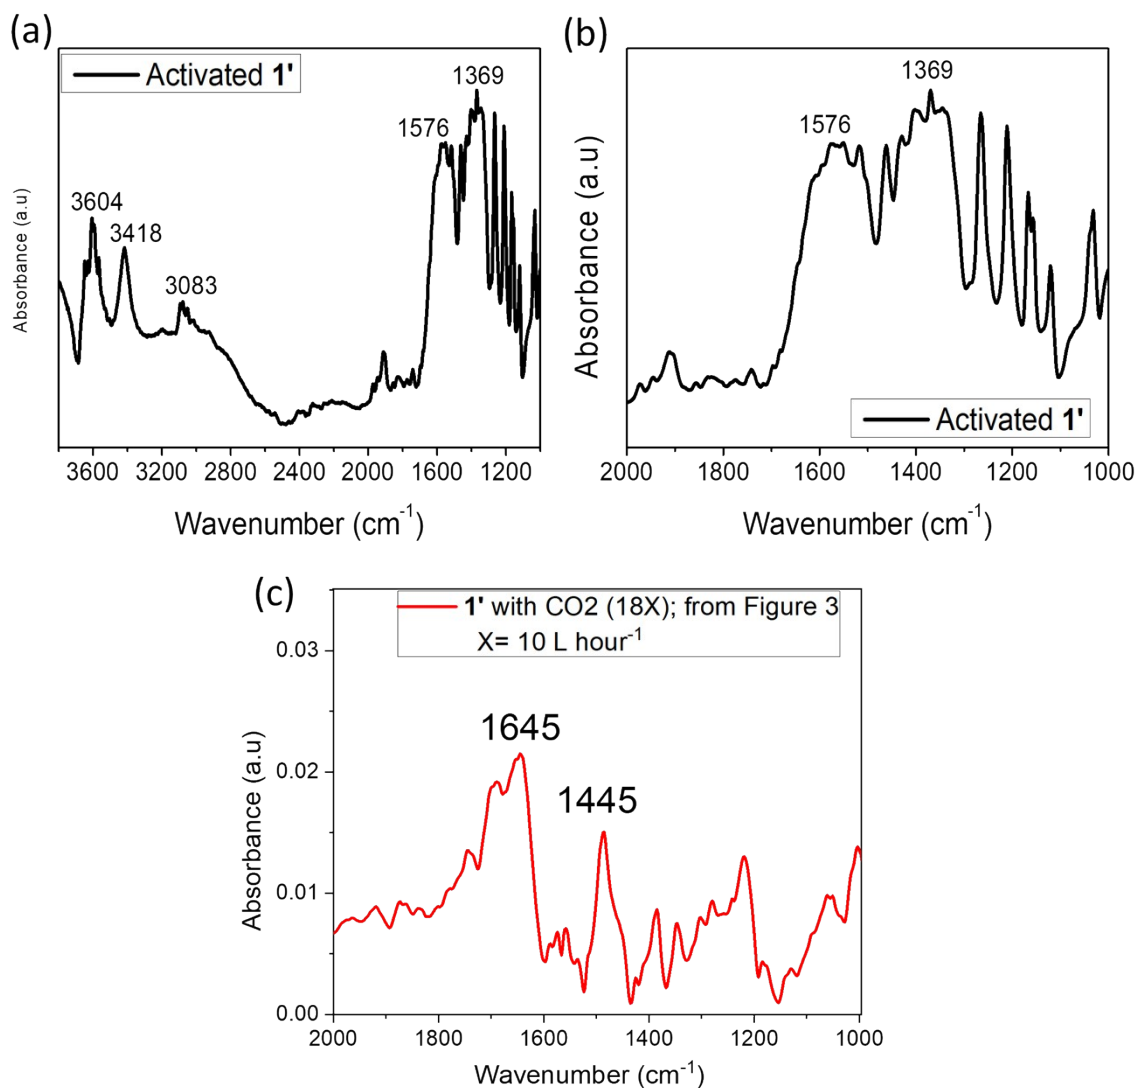

**Figure S9** (a) *In situ* DRIFT of activated **1** (**1'**) without  $\text{CO}_2$  presence. (b) Same spectra as shown in (a), with X-axis wavenumber ranging from 2000 to 1000  $\text{cm}^{-1}$ . (c) One of the representative spectra of activated **1'** dosed with  $\text{CO}_2$  pressure, as shown in **Figure 3**. Here the spectra of 18x is showing where, x= 10  $\text{L hour}^{-1}$ .

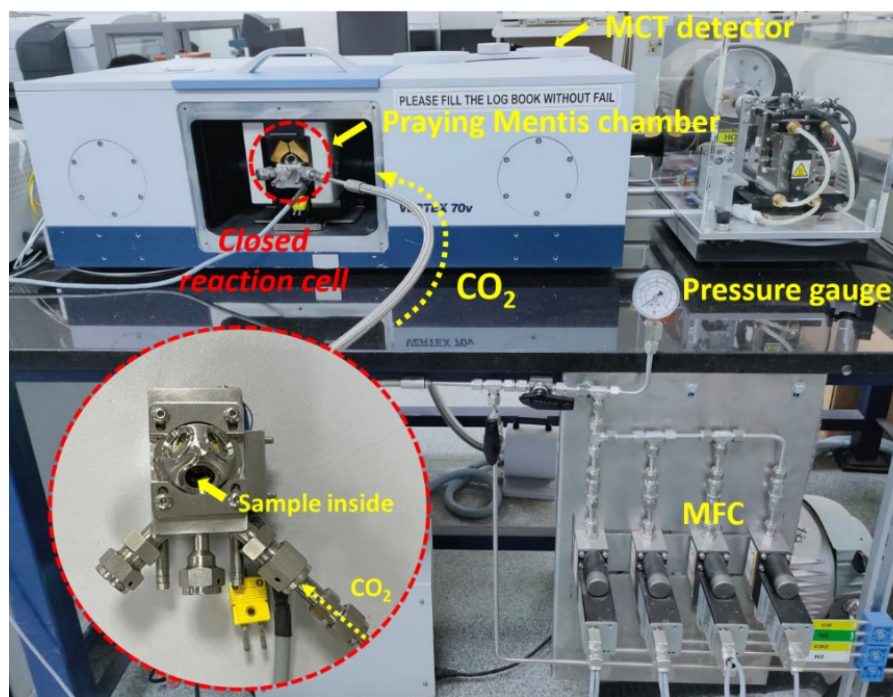

**Figure S10** Pictorial representation of in-situ DRIFT assembly during data collections.

**Table S7** Selected FTIR wavenumber ranges of CO<sub>2</sub>-MOF interaction.

| Wavenumbers (cm <sup>-1</sup> ) | Assignments                                                                                                                         |
|---------------------------------|-------------------------------------------------------------------------------------------------------------------------------------|
| 3734 to 3695                    | Complex pattern; due to -OH vibrational frequencies and CO <sub>2</sub> overtones                                                   |
| 3662 to 3562                    | Bridging hydroxyl groups of the framework                                                                                           |
| 2383, 2362, 2340 and 2312       | Ni <sup>δ+</sup> -O <sup>δ-</sup> -CO type interaction; ν <sub>3</sub> (CO <sub>2</sub> ) mode in interaction with open metal sites |
| 2264                            | Ni···O interaction with CO <sub>2</sub>                                                                                             |
| 1645 and 1487                   | O-C-O stretch signals of carboxylate                                                                                                |

### Computation details:

All the theoretical calculations were performed using density functional theory (DFT) in Gaussian16 program package.<sup>12</sup> The calculations were performed using B3LYP exchange-correlation functional along with 6-31+G\*\* basis set for all atoms except for Ni atoms, for which LANL2DZ, which utilized a widely used effective core potential (ECP)- type basis set, was used.<sup>13-21</sup> The calculations were performed in the absence of any solvent. Grimme's d3 dispersion was also used to tackle weak interactions.<sup>22-24</sup>

## Cartesian coordinates of the computed structures

Coordinates are given in standard XYZ format

**Table S8** DFT-optimized geometry of **CO<sub>2</sub>-bound model** (singlet), computed at the B3LYP-D3/ 6-31+G\*\* (HCO)/ LANL2DZ (Ni) level in the absence of any solvent.

| Atom |    | x           | y           | z           |
|------|----|-------------|-------------|-------------|
| O    | -1 | -7.18650200 | -2.13265000 | 3.91321900  |
| O    | -1 | -7.10206500 | -2.57626100 | 1.71899000  |
| O    | -1 | -1.28153400 | 0.90761300  | 4.44417700  |
| O    | -1 | -0.64820700 | 0.28772200  | 2.39019600  |
| C    | -1 | -6.69467000 | -2.01066600 | 2.75952900  |
| C    | -1 | -5.44624800 | -1.16651000 | 2.67805800  |
| C    | -1 | -4.35264600 | -1.70912100 | 2.07609400  |
| C    | -1 | -3.08476100 | -1.10401700 | 2.22861200  |
| C    | -1 | -2.92611000 | 0.01239100  | 3.01554400  |
| C    | -1 | -4.06759900 | 0.67077300  | 3.56237400  |
| C    | -1 | -5.35272900 | 0.08436300  | 3.36495000  |
| C    | -1 | -6.49769000 | 0.78181100  | 3.82576800  |
| C    | -1 | -6.38486800 | 1.98221900  | 4.43856400  |
| C    | -1 | -5.12217200 | 2.54689600  | 4.67741600  |
| C    | -1 | -3.99531800 | 1.90812400  | 4.25893600  |
| C    | -1 | -1.53140000 | 0.45205600  | 3.32052000  |
| O    | -1 | -8.30318500 | -2.61201600 | -3.05608300 |
| O    | -1 | -8.21879900 | -3.05570900 | -5.25020900 |
| O    | -1 | -2.39826800 | 0.42816300  | -2.52502200 |
| O    | -1 | -1.76489400 | -0.19170500 | -4.57893400 |
| C    | -1 | -7.81133000 | -2.49004900 | -4.20967600 |
| C    | -1 | -6.56293000 | -1.64587600 | -4.29124300 |
| C    | -1 | -5.46940300 | -2.18855300 | -4.89320200 |
| C    | -1 | -4.20151700 | -1.58345000 | -4.74068200 |
| C    | -1 | -4.04279100 | -0.46697500 | -3.95375500 |
| C    | -1 | -5.18428200 | 0.19140800  | -3.40692700 |
| C    | -1 | -6.46941200 | -0.39500300 | -3.60435000 |
| C    | -1 | -7.61437300 | 0.30244500  | -3.14353400 |
| C    | -1 | -7.50160300 | 1.50277000  | -2.53063400 |
| C    | -1 | -6.23876900 | 2.06744000  | -2.29181700 |
| C    | -1 | -5.11197700 | 1.42874100  | -2.71026800 |
| C    | -1 | -2.64808600 | -0.02731900 | -3.64878200 |
| O    | -1 | 6.99604300  | 5.93901800  | 1.30750600  |
| O    | -1 | 7.01103900  | 5.58633800  | -0.90034200 |
| O    | -1 | 1.83424800  | 1.19989500  | 1.47611300  |
| O    | -1 | 2.41960200  | 0.48799000  | -0.56698000 |
| C    | -1 | 6.68728100  | 5.29355000  | 0.27301000  |
| C    | -1 | 5.79672600  | 4.07876000  | 0.42389500  |
| C    | -1 | 4.75571200  | 4.15999100  | 1.30424200  |
| C    | -1 | 3.76617400  | 3.15564300  | 1.33401500  |
| C    | -1 | 3.82882000  | 2.06924300  | 0.49215300  |
| C    | -1 | 4.95809000  | 1.89963100  | -0.37684500 |
| C    | -1 | 5.95446100  | 2.92494200  | -0.39883100 |
| C    | -1 | 7.11452500  | 2.72941200  | -1.19817600 |
| C    | -1 | 7.29034000  | 1.58168400  | -1.91189400 |
| C    | -1 | 6.30799500  | 0.58148700  | -1.90025500 |
| C    | -1 | 5.17302700  | 0.73745600  | -1.15581400 |

|    |    |             |             |             |
|----|----|-------------|-------------|-------------|
| C  | -1 | 2.62671200  | 1.17218300  | 0.45426800  |
| Ni | -1 | 1.31068800  | -0.41613900 | 2.70376900  |
| O  | -1 | 3.20077500  | -1.14646700 | 2.85547600  |
| O  | -1 | 3.35014600  | -1.49404300 | 5.07960900  |
| O  | -1 | 8.88626800  | -5.06413900 | 1.95400100  |
| O  | -1 | 9.02532900  | -5.34335500 | 4.19042200  |
| O  | -1 | 0.48030400  | -1.98948000 | 3.63258100  |
| O  | -1 | 0.39596100  | -1.54589700 | 5.82684700  |
| O  | -1 | -5.42450700 | -5.02984300 | 3.10163300  |
| O  | -1 | -6.05786900 | -4.40983600 | 5.15556500  |
| O  | -1 | 1.66256600  | 0.81596400  | 4.22273000  |
| C  | -1 | 3.75953900  | -1.59972100 | 3.89622100  |
| C  | -1 | 5.03392900  | -2.37706300 | 3.69148600  |
| C  | -1 | 5.15673000  | -3.59799600 | 4.32137800  |
| C  | -1 | 6.29618100  | -4.39734100 | 4.13860800  |
| C  | -1 | 7.31692000  | -3.96808500 | 3.32976700  |
| C  | -1 | 7.25648100  | -2.68989700 | 2.69303500  |
| C  | -1 | 6.08650600  | -1.88328200 | 2.87001100  |
| C  | -1 | 6.06150000  | -0.60175700 | 2.26070800  |
| C  | -1 | 7.11924200  | -0.13904000 | 1.53624300  |
| C  | -1 | 8.26397200  | -0.92687100 | 1.37132900  |
| C  | -1 | 8.33597000  | -2.17166600 | 1.93391300  |
| C  | -1 | 8.51229800  | -4.87616900 | 3.13567100  |
| C  | -1 | -0.01143800 | -2.11163400 | 4.78629100  |
| C  | -1 | -1.25986900 | -2.95578700 | 4.86775600  |
| C  | -1 | -2.35339600 | -2.41310900 | 5.46971400  |
| C  | -1 | -3.62132100 | -3.01815600 | 5.31732000  |
| C  | -1 | -3.77993100 | -4.13462200 | 4.53026400  |
| C  | -1 | -2.63848200 | -4.79294900 | 3.98355900  |
| C  | -1 | -1.35331200 | -4.20659300 | 4.18085900  |
| C  | -1 | -0.20835000 | -4.90404100 | 3.72004200  |
| C  | -1 | -0.32123500 | -6.10437700 | 3.10727200  |
| C  | -1 | -1.58393100 | -6.66905400 | 2.86842100  |
| C  | -1 | -2.71078700 | -6.03028200 | 3.28689900  |
| C  | -1 | -5.17467800 | -4.57422000 | 4.22541400  |
| Ni | -1 | 0.83788700  | -0.71718900 | -1.02802200 |
| Ni | -1 | -0.81559300 | 1.64896700  | -2.04138500 |
| Ni | -1 | -0.17140900 | 1.88113300  | 1.16007200  |
| O  | -1 | 2.08417000  | -1.62564200 | -4.11387900 |
| O  | -1 | 2.23348700  | -1.97342600 | -1.88959500 |
| O  | -1 | 7.76960900  | -5.54352200 | -5.01520400 |
| O  | -1 | 7.90857300  | -5.82278700 | -2.77887300 |
| O  | -1 | -0.63633600 | -2.46895500 | -3.33658100 |
| O  | -1 | -0.72072100 | -2.02526200 | -1.14245400 |
| O  | -1 | -6.54118900 | -5.50920900 | -3.86766900 |
| O  | -1 | -7.17455200 | -4.88920200 | -1.81373500 |
| O  | -1 | 0.64380300  | 3.10680800  | -1.95432900 |
| O  | -1 | 0.62888300  | 3.45955400  | 0.25351300  |
| O  | -1 | 5.80578800  | 7.84598500  | -2.12290900 |
| O  | -1 | 5.22038100  | 8.55782900  | -0.07987600 |
| O  | -1 | 0.54592200  | 0.33610300  | -2.74617400 |
| O  | -1 | -0.49566300 | 0.63377200  | -0.33175300 |
| O  | -1 | 0.01593300  | 3.09955100  | 2.96458000  |
| C  | -1 | 2.64285200  | -2.07918200 | -3.07300300 |
| C  | -1 | 3.91726900  | -2.85644500 | -3.27772000 |
| C  | -1 | 4.04007100  | -4.07737900 | -2.64782800 |
| C  | -1 | 5.17956100  | -4.87678000 | -2.83072000 |
| C  | -1 | 6.20023700  | -4.44745000 | -3.63953300 |
| C  | -1 | 6.13982000  | -3.16928000 | -4.27616800 |
| C  | -1 | 4.96984800  | -2.36266500 | -4.09919400 |



|   |    |             |             |             |
|---|----|-------------|-------------|-------------|
| C | -1 | 4.94490400  | -1.08121200 | -4.70852400 |
| C | -1 | 6.00258200  | -0.61842300 | -5.43296200 |
| C | -1 | 7.14737600  | -1.40632700 | -5.59790400 |
| C | -1 | 7.21930900  | -2.65104900 | -5.03529300 |
| C | -1 | 7.39561600  | -5.35553400 | -3.83363000 |
| C | -1 | -1.12810600 | -2.59101400 | -2.18291900 |
| C | -1 | -2.37652700 | -3.43516900 | -2.10144800 |
| C | -1 | -3.47005500 | -2.89249200 | -1.49949000 |
| C | -1 | -4.73800300 | -3.49752200 | -1.65198100 |
| C | -1 | -4.89666600 | -4.61407000 | -2.43893500 |
| C | -1 | -3.75510200 | -5.27238700 | -2.98577000 |
| C | -1 | -2.46997200 | -4.68597600 | -2.78834600 |
| C | -1 | -1.32501000 | -5.38342400 | -3.24916400 |
| C | -1 | -1.43791700 | -6.58374200 | -3.86202900 |
| C | -1 | -2.70061400 | -7.14841900 | -4.10088000 |
| C | -1 | -3.82744600 | -6.50966300 | -3.68230500 |
| C | -1 | -6.29136000 | -5.05358700 | -2.74388700 |
| C | -1 | 0.95264100  | 3.75234200  | -0.91983900 |
| C | -1 | 1.84319500  | 4.96713100  | -1.07072300 |
| C | -1 | 2.88421000  | 4.88590200  | -1.95107200 |
| C | -1 | 3.87381000  | 5.89017600  | -1.98087100 |
| C | -1 | 3.81116400  | 6.97657600  | -1.13900900 |
| C | -1 | 2.68183000  | 7.14626000  | -0.26998400 |
| C | -1 | 1.68538500  | 6.12088400  | -0.24799100 |
| C | -1 | 0.52537400  | 6.31649600  | 0.55125200  |
| C | -1 | 0.34958000  | 7.46420800  | 1.26506500  |
| C | -1 | 1.33192500  | 8.46440500  | 1.25342700  |
| C | -1 | 2.46689400  | 8.30843600  | 0.50898600  |
| C | -1 | 5.01325300  | 7.87363200  | -1.10113700 |
| O | -1 | -1.10080200 | 2.62010100  | -4.00462000 |
| O | -1 | -7.88365700 | 6.82055600  | -0.32339400 |
| O | -1 | -7.73426600 | 6.47283700  | 1.90088500  |
| O | -1 | -2.19814400 | 2.90274100  | -1.22472400 |
| O | -1 | -2.05911800 | 2.62340400  | 1.01157900  |
| C | -1 | -7.32497700 | 6.36701500  | 0.71748400  |
| C | -1 | -6.05055900 | 5.58975200  | 0.51276700  |
| C | -1 | -5.92775700 | 4.36881900  | 1.14265700  |
| C | -1 | -4.78826700 | 3.56941700  | 0.95976500  |
| C | -1 | -3.76751600 | 3.99881200  | 0.15094700  |
| C | -1 | -3.82800600 | 5.27691700  | -0.48568300 |
| C | -1 | -4.99798100 | 6.08353200  | -0.30870700 |
| C | -1 | -5.02285000 | 7.36505100  | -0.91804400 |
| C | -1 | -3.96524600 | 7.82777500  | -1.64247500 |
| C | -1 | -2.82045300 | 7.03987000  | -1.80741700 |
| C | -1 | -2.74844300 | 5.79521500  | -1.24481300 |
| C | -1 | -2.57221200 | 3.09066200  | -0.04314300 |
| H | -1 | -8.69385100 | 7.27428600  | -0.07985200 |
| H | -1 | -8.97558300 | -3.60736900 | -5.03914000 |
| H | -1 | -8.03372000 | -5.17301400 | -2.13448700 |
| H | -1 | -7.85883200 | -3.12796500 | 1.93000100  |
| H | -1 | -6.91703600 | -4.69364800 | 4.83481500  |
| H | -1 | 6.55501800  | 8.42436100  | -1.96249000 |
| H | -1 | 7.52503100  | 6.70182200  | 1.06275800  |
| H | -1 | 8.66327700  | -6.37101600 | -3.00573700 |
| H | -1 | 9.78007400  | -5.89152300 | 3.96354500  |
| H | -1 | 0.76129900  | -4.47361000 | 3.85936000  |
| H | -1 | 0.56015700  | -6.62846900 | 2.80170200  |
| H | -1 | -0.55653100 | -7.10780500 | -4.16766800 |
| H | -1 | -0.35535300 | -4.95303200 | -3.10978000 |
| H | -1 | -3.66727700 | -6.46678300 | 3.08818000  |

|   |    |             |             |             |
|---|----|-------------|-------------|-------------|
| H | -1 | -1.66097500 | -7.60497000 | 2.35555900  |
| H | -1 | -2.77767300 | -8.08429900 | -4.61380500 |
| H | -1 | -4.78394600 | -6.94620600 | -3.88089400 |
| H | -1 | -3.36939600 | -2.00561900 | -0.90938500 |
| H | -1 | -5.58560000 | -3.08147900 | -1.14860500 |
| H | -1 | -3.35392500 | -1.99945600 | -5.24409600 |
| H | -1 | -5.57002300 | -3.07543800 | -5.48329400 |
| H | -1 | -8.58400700 | -0.12798500 | -3.28295100 |
| H | -1 | -8.38300300 | 2.02679900  | -2.22497500 |
| H | -1 | -6.16170700 | 3.00335700  | -1.77895800 |
| H | -1 | -4.15549200 | 1.86525900  | -2.51155300 |
| H | -1 | -2.23715400 | -1.51999100 | 1.72519300  |
| H | -1 | -4.45323600 | -2.59599300 | 1.48597600  |
| H | -1 | -7.46732700 | 0.35135300  | 3.68644800  |
| H | -1 | -7.26627700 | 2.50629500  | 4.74411700  |
| H | -1 | -5.04513000 | 3.48281200  | 5.19027700  |
| H | -1 | -3.03883200 | 2.34466600  | 4.45759700  |
| H | -1 | -2.25273600 | -1.52619900 | 6.05976000  |
| H | -1 | -4.46889700 | -2.60221800 | 5.82081900  |
| H | -1 | 4.07719500  | -0.46517400 | -4.59682400 |
| H | -1 | 5.95736100  | 0.35341100  | -5.87837600 |
| H | -1 | 7.97205200  | -1.03248500 | -6.16803500 |
| H | -1 | 8.10163300  | -3.24122200 | -5.16983400 |
| H | -1 | 5.25178200  | -5.82364500 | -2.33763800 |
| H | -1 | 3.25352800  | -4.42106000 | -2.00897400 |
| H | -1 | 7.07403100  | 0.83277200  | 1.09078300  |
| H | -1 | 9.08864900  | -0.55298300 | 0.80122700  |
| H | -1 | 9.21829600  | -2.76182600 | 1.79933700  |
| H | -1 | 5.19381000  | 0.01430200  | 2.37244100  |
| H | -1 | 6.36839700  | -5.34415400 | 4.63179000  |
| H | -1 | 4.37014300  | -3.94169600 | 4.96016400  |
| H | -1 | 4.68769800  | 5.80576900  | -2.67033800 |
| H | -1 | 2.94933700  | 4.05516700  | -2.62229400 |
| H | -1 | 3.20804100  | 9.08016400  | 0.51492500  |
| H | -1 | 1.19207700  | 9.35450800  | 1.83053800  |
| H | -1 | -0.54356200 | 7.60269900  | 1.83779100  |
| H | -1 | -0.22088700 | 5.55081600  | 0.59282400  |
| H | -1 | 7.86071100  | 3.49516100  | -1.23984900 |
| H | -1 | 8.18351300  | 1.44315500  | -2.48456500 |
| H | -1 | 6.44784300  | -0.30861600 | -2.47736700 |
| H | -1 | 4.43188000  | -0.03427300 | -1.16175300 |
| H | -1 | 4.69053600  | 4.99073200  | 1.97545000  |
| H | -1 | 2.95229500  | 3.24000100  | 2.02349600  |
| H | -1 | -6.71430000 | 4.02513700  | 1.78151100  |
| H | -1 | -4.71605800 | 2.62253100  | 1.45280900  |
| H | -1 | -1.86607600 | 5.20509700  | -1.37930500 |
| H | -1 | -1.99580400 | 7.41371700  | -2.37758700 |
| H | -1 | -4.01047600 | 8.79959200  | -2.08792600 |
| H | -1 | -5.89051500 | 7.98114300  | -0.80629600 |
| H | -1 | -1.92537900 | 3.10671600  | -3.93475500 |
| H | -1 | -0.32109500 | 3.16362600  | -4.13966500 |
| H | -1 | -0.80860600 | 3.58622900  | 3.03443500  |
| H | -1 | 0.79566900  | 3.64303000  | 2.82952800  |
| H | -1 | 1.27434700  | 1.67346400  | 4.03605700  |
| H | -1 | -1.23434700 | 0.13234600  | 0.02112100  |
| H | -1 | 1.34304100  | 0.75186200  | -3.08284200 |
| O | 0  | 1.50226600  | -2.57521800 | 0.86155600  |
| C | 0  | 2.56061500  | -3.07922400 | 0.83813900  |
| O | 0  | 3.59388200  | -3.61919400 | 0.80154500  |
| H | -1 | 0.11123000  | -1.86756500 | -3.30379400 |

|   |    |             |             |             |
|---|----|-------------|-------------|-------------|
| H | -1 | 0.22335100  | -0.19865000 | -3.47527400 |
| H | -1 | 1.27341800  | 0.45589100  | 5.02351000  |
| H | -1 | -0.34566700 | 1.11251900  | 4.50554700  |

-----

Total Electronic Energy = -8111.142086 (Hartree/Particle).

**Table S9** DFT-optimized geometry of **C<sub>2</sub>H<sub>2</sub>-bound model** (singlet), computed at the B3LYP-D3/ 6-31+G\*\* (HCO)/ LANL2DZ (Ni) level in the absence of any solvent.

| Atom |    | x           | y           | z           |
|------|----|-------------|-------------|-------------|
| O    | -1 | -7.19356300 | -2.04058000 | 3.91027500  |
| O    | -1 | -7.11158900 | -2.48999900 | 1.71713600  |
| O    | -1 | -1.24723500 | 0.91724800  | 4.44525100  |
| O    | -1 | -0.61929500 | 0.28381400  | 2.39383800  |
| C    | -1 | -6.69806200 | -1.92799300 | 2.75720000  |
| C    | -1 | -5.43771900 | -1.10170000 | 2.67615600  |
| C    | -1 | -4.35083700 | -1.66095300 | 2.07726200  |
| C    | -1 | -3.07481100 | -1.07346400 | 2.23074300  |
| C    | -1 | -2.90179500 | 0.04226800  | 3.01560700  |
| C    | -1 | -4.03483300 | 0.71784100  | 3.55903900  |
| C    | -1 | -5.32775900 | 0.14918900  | 3.36058300  |
| C    | -1 | -6.46356800 | 0.86368800  | 3.81791600  |
| C    | -1 | -6.33488900 | 2.06368600  | 4.42838800  |
| C    | -1 | -5.06477100 | 2.61101000  | 4.66827600  |
| C    | -1 | -3.94631400 | 1.95552600  | 4.25312700  |
| C    | -1 | -1.50147600 | 0.46309300  | 3.32214600  |
| O    | -1 | -8.30482000 | -2.51896600 | -3.05996000 |
| O    | -1 | -8.22289800 | -2.96846700 | -5.25299700 |
| O    | -1 | -2.35854400 | 0.43878000  | -2.52488300 |
| O    | -1 | -1.73041800 | -0.19432300 | -4.57637000 |
| C    | -1 | -7.80929500 | -2.40639600 | -4.21293900 |
| C    | -1 | -6.54897600 | -1.58008500 | -4.29407800 |
| C    | -1 | -5.46217000 | -2.13940400 | -4.89296700 |
| C    | -1 | -4.18614200 | -1.55191400 | -4.73948700 |
| C    | -1 | -4.01305100 | -0.43612000 | -3.95462900 |
| C    | -1 | -5.14608700 | 0.23945400  | -3.41119600 |
| C    | -1 | -6.43901600 | -0.32919800 | -3.60965300 |
| C    | -1 | -7.57482400 | 0.38530300  | -3.15231900 |
| C    | -1 | -7.44619900 | 1.58521800  | -2.54174600 |
| C    | -1 | -6.17594400 | 2.13253300  | -2.30188900 |
| C    | -1 | -5.05754800 | 1.47712200  | -2.71701200 |
| C    | -1 | -2.61281400 | -0.01552300 | -3.64812200 |
| O    | -1 | 7.10589700  | 5.82476900  | 1.31260700  |
| O    | -1 | 7.11974200  | 5.46722100  | -0.89446500 |
| O    | -1 | 1.87730400  | 1.15924500  | 1.48196600  |
| O    | -1 | 2.45629100  | 0.43483400  | -0.55848400 |
| C    | -1 | 6.78985500  | 5.18152000  | 0.27892800  |
| C    | -1 | 5.88199700  | 3.97973200  | 0.43079400  |
| C    | -1 | 4.84070800  | 4.07750300  | 1.30913300  |
| C    | -1 | 3.83705500  | 3.08727100  | 1.33927300  |
| C    | -1 | 3.88583000  | 1.99831000  | 0.49980600  |
| C    | -1 | 5.01410200  | 1.81094700  | -0.36684200 |
| C    | -1 | 6.02487000  | 2.82205900  | -0.38922700 |
| C    | -1 | 7.18344300  | 2.60849300  | -1.18611300 |

|    |    |             |             |             |
|----|----|-------------|-------------|-------------|
| C  | -1 | 7.34429200  | 1.45688600  | -1.89710700 |
| C  | -1 | 6.34792100  | 0.47066600  | -1.88509800 |
| C  | -1 | 5.21397700  | 0.64420300  | -1.14298800 |
| C  | -1 | 2.67132100  | 1.11822400  | 0.46173400  |
| Ni | -1 | 1.32925000  | -0.44586400 | 2.71168800  |
| O  | -1 | 3.20826200  | -1.20356600 | 2.86869200  |
| O  | -1 | 3.34900700  | -1.54811500 | 5.09388800  |
| O  | -1 | 8.83963700  | -5.20254600 | 1.98554700  |
| O  | -1 | 8.97087300  | -5.47893900 | 4.22279100  |
| O  | -1 | 0.47525300  | -2.00616100 | 3.64302600  |
| O  | -1 | 0.39309300  | -1.55672400 | 5.83602500  |
| O  | -1 | -5.47119900 | -4.96404500 | 3.10788400  |
| O  | -1 | -6.09931100 | -4.33080500 | 5.15939100  |
| O  | -1 | 1.69548400  | 0.78299400  | 4.22980200  |
| C  | -1 | 3.75901200  | -1.66182500 | 3.91150500  |
| C  | -1 | 5.02257000  | -2.45773400 | 3.71059100  |
| C  | -1 | 5.12705100  | -3.67893600 | 4.34326200  |
| C  | -1 | 6.25543000  | -4.49465300 | 4.16418100  |
| C  | -1 | 7.28352100  | -4.08155200 | 3.35624000  |
| C  | -1 | 7.24221700  | -2.80399600 | 2.71671900  |
| C  | -1 | 6.08343000  | -1.98059300 | 2.88993800  |
| C  | -1 | 6.07755500  | -0.70013900 | 2.27790100  |
| C  | -1 | 7.14296900  | -0.25392300 | 1.55433100  |
| C  | -1 | 8.27675900  | -1.05816300 | 1.39308900  |
| C  | -1 | 8.33022000  | -2.30265000 | 1.95841200  |
| C  | -1 | 8.46630700  | -5.00680900 | 3.16615900  |
| C  | -1 | -0.02055700 | -2.11883500 | 4.79589700  |
| C  | -1 | -1.28079000 | -2.94516400 | 4.87698300  |
| C  | -1 | -2.36759600 | -2.38584500 | 5.47587300  |
| C  | -1 | -3.64366200 | -2.97327700 | 5.32251500  |
| C  | -1 | -3.81663900 | -4.08906500 | 4.53752700  |
| C  | -1 | -2.68364200 | -4.76458100 | 3.99421900  |
| C  | -1 | -1.39067400 | -4.19598700 | 4.19255100  |
| C  | -1 | -0.25486600 | -4.91048500 | 3.73521900  |
| C  | -1 | -0.38360600 | -6.11040800 | 3.12477300  |
| C  | -1 | -1.65372400 | -6.65773400 | 2.88488500  |
| C  | -1 | -2.77218100 | -6.00224900 | 3.30003500  |
| C  | -1 | -5.21691600 | -4.50960300 | 4.23114400  |
| Ni | -1 | 0.85853800  | -0.74890200 | -1.01977900 |
| Ni | -1 | -0.75965100 | 1.63817300  | -2.04102300 |
| Ni | -1 | -0.11781500 | 1.86796500  | 1.16097200  |
| O  | -1 | 2.09723000  | -1.68139100 | -4.10152100 |
| O  | -1 | 2.23777300  | -2.02651700 | -1.87625100 |
| O  | -1 | 7.72840200  | -5.68094800 | -4.98459300 |
| O  | -1 | 7.85954000  | -5.95739200 | -2.74743900 |
| O  | -1 | -0.63624300 | -2.48461300 | -3.32724800 |
| O  | -1 | -0.71816200 | -2.03511100 | -1.13421000 |
| O  | -1 | -6.58245500 | -5.44243200 | -3.86235100 |
| O  | -1 | -7.21056800 | -4.80919100 | -1.81084500 |
| O  | -1 | 0.72000700  | 3.07547500  | -1.95445900 |
| O  | -1 | 0.70623800  | 3.43308800  | 0.25260700  |
| O  | -1 | 5.94859700  | 7.74103300  | -2.12389800 |
| O  | -1 | 5.36975000  | 8.46540000  | -0.08340000 |
| O  | -1 | 0.58443300  | 0.30474900  | -2.74065300 |
| O  | -1 | -0.45703300 | 0.62220500  | -0.32870100 |
| O  | -1 | 0.08357500  | 3.08752600  | 2.96333900  |
| C  | -1 | 2.64765400  | -2.14055100 | -3.05871000 |
| C  | -1 | 3.91133700  | -2.93613800 | -3.25954800 |
| C  | -1 | 4.01581700  | -4.15734000 | -2.62687700 |
| C  | -1 | 5.14423400  | -4.97311400 | -2.80608100 |

|   |    |             |             |             |
|---|----|-------------|-------------|-------------|
| C | -1 | 6.17226400  | -4.55993800 | -3.61399500 |
| C | -1 | 6.13098300  | -3.28239900 | -4.25342100 |
| C | -1 | 4.97219600  | -2.45899500 | -4.08020100 |
| C | -1 | 4.96638100  | -1.17861500 | -4.69226600 |
| C | -1 | 6.03173600  | -0.73232400 | -5.41580900 |
| C | -1 | 7.16558700  | -1.53664000 | -5.57707700 |
| C | -1 | 7.21898500  | -2.78105400 | -5.01172700 |
| C | -1 | 7.35505200  | -5.48519600 | -3.80407700 |
| C | -1 | -1.13168200 | -2.59727100 | -2.17420000 |
| C | -1 | -2.39202400 | -3.42356700 | -2.09315600 |
| C | -1 | -3.47883000 | -2.86424800 | -1.49426700 |
| C | -1 | -4.75491800 | -3.45166200 | -1.64772100 |
| C | -1 | -4.92794900 | -4.56753200 | -2.43260500 |
| C | -1 | -3.79483500 | -5.24304100 | -2.97604400 |
| C | -1 | -2.50190800 | -4.67438900 | -2.77758800 |
| C | -1 | -1.36610000 | -5.38888900 | -3.23492100 |
| C | -1 | -1.49486200 | -6.58879600 | -3.84546100 |
| C | -1 | -2.76498100 | -7.13612000 | -4.08535100 |
| C | -1 | -3.88341500 | -6.48065100 | -3.67010500 |
| C | -1 | -6.32817200 | -4.98798900 | -2.73909100 |
| C | -1 | 1.03612500  | 3.71878700  | -0.92078500 |
| C | -1 | 1.94398300  | 4.92057600  | -1.07265200 |
| C | -1 | 2.98527200  | 4.82280700  | -1.95099100 |
| C | -1 | 3.98898700  | 5.81296300  | -1.98115700 |
| C | -1 | 3.94021000  | 6.90192600  | -1.14169000 |
| C | -1 | 2.81187900  | 7.08936200  | -0.27501500 |
| C | -1 | 1.80103500  | 6.07818600  | -0.25262400 |
| C | -1 | 0.64251500  | 6.29183100  | 0.54416000  |
| C | -1 | 0.48168700  | 7.44342200  | 1.25525000  |
| C | -1 | 1.47805900  | 8.42964400  | 1.24324100  |
| C | -1 | 2.61200300  | 8.25610600  | 0.50113100  |
| C | -1 | 5.15476300  | 7.78202200  | -1.10358600 |
| O | -1 | -1.02773400 | 2.60905700  | -4.00679500 |
| O | -1 | -7.75704400 | 6.91254000  | -0.34635900 |
| O | -1 | -7.61642500 | 6.56747900  | 1.87890600  |
| O | -1 | -2.12579600 | 2.91304800  | -1.22943700 |
| O | -1 | -1.99459600 | 2.63653200  | 1.00769000  |
| C | -1 | -7.20661900 | 6.45338200  | 0.69645200  |
| C | -1 | -5.94293800 | 5.65779400  | 0.49561400  |
| C | -1 | -5.83845700 | 4.43659200  | 1.12828500  |
| C | -1 | -4.71003900 | 3.62081800  | 0.94908000  |
| C | -1 | -3.68193300 | 4.03405800  | 0.14116100  |
| C | -1 | -3.72329100 | 5.31153300  | -0.49825800 |
| C | -1 | -4.88207800 | 6.13493700  | -0.32503900 |
| C | -1 | -4.88781500 | 7.41538200  | -0.93710900 |
| C | -1 | -3.82253800 | 7.86160800  | -1.66064700 |
| C | -1 | -2.68868700 | 7.05729200  | -1.82191500 |
| C | -1 | -2.63521200 | 5.81294400  | -1.25657100 |
| C | -1 | -2.49922300 | 3.10873600  | -0.04891500 |
| H | -1 | -8.56118100 | 7.37816500  | -0.10520000 |
| H | -1 | -8.98775200 | -3.50895300 | -5.04210300 |
| H | -1 | -8.07309500 | -5.08154400 | -2.13251300 |
| H | -1 | -7.87642500 | -3.03052800 | 1.92797300  |
| H | -1 | -6.96183900 | -4.60315700 | 4.83772300  |
| H | -1 | 6.70563100  | 8.30912800  | -1.96337500 |
| H | -1 | 7.64601200  | 6.57951700  | 1.06719100  |
| H | -1 | 8.60682800  | -6.51668900 | -2.97181900 |
| H | -1 | 9.71820300  | -6.03817600 | 3.99839800  |
| H | -1 | 0.72051500  | -4.49347200 | 3.87534000  |
| H | -1 | 0.49083700  | -6.64752400 | 2.82186000  |

|   |    |             |             |             |
|---|----|-------------|-------------|-------------|
| H | -1 | -0.62042500 | -7.12588100 | -4.14844500 |
| H | -1 | -0.39071200 | -4.97191500 | -3.09473400 |
| H | -1 | -3.73438800 | -6.42564300 | 3.10054600  |
| H | -1 | -1.74306900 | -7.59355800 | 2.37385600  |
| H | -1 | -2.85434300 | -8.07190700 | -4.59644300 |
| H | -1 | -4.84563200 | -6.90408600 | -3.86946200 |
| H | -1 | -3.36669600 | -1.97762900 | -0.90585100 |
| H | -1 | -5.59743400 | -3.02264100 | -1.14671400 |
| H | -1 | -3.34363000 | -1.98089900 | -5.24053100 |
| H | -1 | -5.57426400 | -3.02603400 | -5.48137300 |
| H | -1 | -8.55019000 | -0.03171100 | -3.29254200 |
| H | -1 | -8.32065000 | 2.12226900  | -2.23874100 |
| H | -1 | -6.08658000 | 3.06835800  | -1.79086500 |
| H | -1 | -4.09534800 | 1.90053200  | -2.51753000 |
| H | -1 | -2.23228400 | -1.50241400 | 1.72969200  |
| H | -1 | -4.46290300 | -2.54757000 | 1.48883200  |
| H | -1 | -7.43893700 | 0.44665000  | 3.67779200  |
| H | -1 | -7.20934700 | 2.60078600  | 4.73128400  |
| H | -1 | -4.97542600 | 3.54683500  | 5.17930600  |
| H | -1 | -2.98411300 | 2.37896100  | 4.45255600  |
| H | -1 | -2.25546100 | -1.49918800 | 6.06423000  |
| H | -1 | -4.48615900 | -2.54436200 | 5.82364500  |
| H | -1 | 4.10725400  | -0.55016800 | -4.58338900 |
| H | -1 | 6.00099600  | 0.23910000  | -5.86334400 |
| H | -1 | 7.99644000  | -1.17567600 | -6.14654000 |
| H | -1 | 8.09313000  | -3.38389300 | -5.14347300 |
| H | -1 | 5.20224100  | -5.91985400 | -2.31088600 |
| H | -1 | 3.22339900  | -4.48853800 | -1.98869000 |
| H | -1 | 7.11224100  | 0.71748400  | 1.10675000  |
| H | -1 | 9.10761300  | -0.69715200 | 0.82365600  |
| H | -1 | 9.20436800  | -2.90547500 | 1.82663200  |
| H | -1 | 5.21844700  | -0.07167000 | 2.38680900  |
| H | -1 | 6.31343200  | -5.44134200 | 4.65947800  |
| H | -1 | 4.33458900  | -4.01015400 | 4.98138200  |
| H | -1 | 4.80279600  | 5.71562400  | -2.66900800 |
| H | -1 | 3.03984000  | 3.98981200  | -2.62035100 |
| H | -1 | 3.36394900  | 9.01732000  | 0.50675400  |
| H | -1 | 1.34977800  | 9.32285400  | 1.81823500  |
| H | -1 | -0.41040400 | 7.59571000  | 1.82611000  |
| H | -1 | -0.11454200 | 5.53684100  | 0.58602600  |
| H | -1 | 7.94042600  | 3.36355500  | -1.22808000 |
| H | -1 | 8.23641400  | 1.30456200  | -2.46791100 |
| H | -1 | 6.47620200  | -0.42254600 | -2.46009200 |
| H | -1 | 4.46203000  | -0.11701100 | -1.14861200 |
| H | -1 | 4.78609100  | 4.91050600  | 1.97847800  |
| H | -1 | 3.02325200  | 3.18456300  | 2.02714000  |
| H | -1 | -6.63087400 | 4.10539400  | 1.76647200  |
| H | -1 | -4.65204600 | 2.67405700  | 1.44423900  |
| H | -1 | -1.76102400 | 5.21015800  | -1.38826800 |
| H | -1 | -1.85786000 | 7.41826200  | -2.39141500 |
| H | -1 | -3.85328700 | 8.83301600  | -2.10821800 |
| H | -1 | -5.74689900 | 8.04388300  | -0.82818500 |
| H | -1 | -1.84548500 | 3.10739700  | -3.93940400 |
| H | -1 | -0.24020700 | 3.14124700  | -4.14160700 |
| H | -1 | -0.73413800 | 3.58592800  | 3.03072000  |
| H | -1 | 0.87113400  | 3.61966900  | 2.82852100  |
| H | -1 | 1.32022700  | 1.64623200  | 4.03988300  |
| H | -1 | -1.20332400 | 0.13199500  | 0.02392300  |
| H | -1 | 1.38791800  | 0.70851000  | -3.07678900 |
| C | 0  | 2.08881600  | -3.22005800 | 0.87826400  |

|   |    |             |             |             |
|---|----|-------------|-------------|-------------|
| H | 0  | 3.06634300  | -2.79332900 | 0.89637200  |
| C | 0  | 0.96404100  | -3.66022400 | 0.89467300  |
| H | 0  | -0.02786800 | -4.04441900 | 0.94566300  |
| H | -1 | 1.29984100  | 0.43085800  | 5.02994500  |
| H | -1 | 0.25561700  | -0.22695300 | -3.46919400 |
| H | -1 | -0.30867900 | 1.10906900  | 4.50783900  |
| H | -1 | 0.11967300  | -1.89375300 | -3.29440600 |

-----

Total Electronic Energy = -7999.875089 (Hartree/Particle).

**Table S10** Freezed geometry of **desolvated MOF (1')** (singlet), computed at the B3LYP-D3/6-31+G\*\* (HCO)/ LANL2DZ (Ni) level in the absence of any solvent.

| Atom |    | x           | y           | z           |
|------|----|-------------|-------------|-------------|
| O    | -1 | -7.19787800 | -1.99685900 | 3.92368000  |
| O    | -1 | -7.11711300 | -2.45959100 | 1.73326600  |
| O    | -1 | -1.22668000 | 0.91214300  | 4.44929200  |
| O    | -1 | -0.60163500 | 0.26173800  | 2.40229200  |
| C    | -1 | -6.69999100 | -1.89522800 | 2.77061400  |
| C    | -1 | -5.43240200 | -1.08041200 | 2.68644400  |
| C    | -1 | -4.34969300 | -1.65254000 | 2.09216900  |
| C    | -1 | -3.06878800 | -1.07530300 | 2.24391100  |
| C    | -1 | -2.88703100 | 0.04337900  | 3.02257400  |
| C    | -1 | -4.01481200 | 0.73190200  | 3.56066000  |
| C    | -1 | -5.31239700 | 0.17339000  | 3.36381400  |
| C    | -1 | -6.44250300 | 0.90036700  | 3.81557500  |
| C    | -1 | -6.30413200 | 2.10269300  | 4.41930700  |
| C    | -1 | -5.02959300 | 2.64031600  | 4.65767900  |
| C    | -1 | -3.91637500 | 1.97274500  | 4.24773900  |
| C    | -1 | -1.48356300 | 0.45353100  | 3.32845800  |
| O    | -1 | -8.30465200 | -2.50567000 | -3.04511400 |
| O    | -1 | -8.22394100 | -2.96848300 | -5.23542600 |
| O    | -1 | -2.33350800 | 0.40325100  | -2.51940000 |
| O    | -1 | -1.70838700 | -0.24709000 | -4.56640500 |
| C    | -1 | -7.80674300 | -2.40405500 | -4.19808400 |
| C    | -1 | -6.53917500 | -1.58922300 | -4.28235000 |
| C    | -1 | -5.45654300 | -2.16141500 | -4.87661800 |
| C    | -1 | -4.17563800 | -1.58417900 | -4.72487600 |
| C    | -1 | -3.99380500 | -0.46543200 | -3.94622000 |
| C    | -1 | -5.12158500 | 0.22309200  | -3.40813400 |
| C    | -1 | -6.41917000 | -0.33542100 | -3.60498000 |
| C    | -1 | -7.54927700 | 0.39155600  | -3.15321900 |
| C    | -1 | -7.41096100 | 1.59380200  | -2.54938500 |
| C    | -1 | -6.13628400 | 2.13141400  | -2.31104500 |
| C    | -1 | -5.02312700 | 1.46391800  | -2.72095800 |
| C    | -1 | -2.59033700 | -0.05528000 | -3.64033600 |
| O    | -1 | 7.17273700  | 5.72867700  | 1.29924100  |
| O    | -1 | 7.18619200  | 5.35832500  | -0.90572100 |
| O    | -1 | 1.90358300  | 1.10991200  | 1.48875800  |
| O    | -1 | 2.47868000  | 0.36872700  | -0.54682600 |
| C    | -1 | 6.85238100  | 5.08226500  | 0.26886900  |
| C    | -1 | 5.93390400  | 3.88931600  | 0.42647000  |
| C    | -1 | 4.89242300  | 4.00119700  | 1.30289500  |
| C    | -1 | 3.88014600  | 3.01992800  | 1.33743300  |

|    |    |             |             |             |
|----|----|-------------|-------------|-------------|
| C  | -1 | 3.92047400  | 1.92576800  | 0.50430000  |
| C  | -1 | 5.04813900  | 1.72360900  | -0.35980700 |
| C  | -1 | 6.06770100  | 2.72574100  | -0.38670200 |
| C  | -1 | 7.22535400  | 2.49752000  | -1.18086000 |
| C  | -1 | 7.37704500  | 1.34048300  | -1.88501800 |
| C  | -1 | 6.37210900  | 0.36305500  | -1.86862400 |
| C  | -1 | 5.23880300  | 0.55072200  | -1.12898000 |
| C  | -1 | 2.69835000  | 1.05606900  | 0.46969100  |
| Ni | -1 | 1.33974900  | -0.48404500 | 2.72738100  |
| O  | -1 | 3.21235000  | -1.25584300 | 2.89068900  |
| O  | -1 | 3.34711200  | -1.58934800 | 5.11798700  |
| O  | -1 | 8.80954100  | -5.30925000 | 2.03774800  |
| O  | -1 | 8.93560100  | -5.57389400 | 4.27671000  |
| O  | -1 | 0.47108700  | -2.03069500 | 3.66594900  |
| O  | -1 | 0.39032200  | -1.56796300 | 5.85636300  |
| O  | -1 | -5.50005000 | -4.93977200 | 3.14031000  |
| O  | -1 | -6.12515600 | -4.28929200 | 5.18733700  |
| O  | -1 | 1.71522200  | 0.75134200  | 4.23810400  |
| C  | -1 | 3.75744500  | -1.71374800 | 3.93673000  |
| C  | -1 | 5.01439700  | -2.52144400 | 3.74209000  |
| C  | -1 | 5.10745600  | -3.73984600 | 4.38190000  |
| C  | -1 | 6.22890800  | -4.56636900 | 4.20895800  |
| C  | -1 | 7.26155500  | -4.16688700 | 3.39997900  |
| C  | -1 | 7.23216900  | -2.89272200 | 2.75307600  |
| C  | -1 | 6.08038400  | -2.05828200 | 2.92007300  |
| C  | -1 | 6.08641700  | -0.78137000 | 2.30068200  |
| C  | -1 | 7.15657000  | -0.34861400 | 1.57593000  |
| C  | -1 | 8.28351100  | -1.16360600 | 1.42076800  |
| C  | -1 | 8.32543200  | -2.40523600 | 1.99330000  |
| C  | -1 | 8.43647300  | -5.10348100 | 3.21673600  |
| C  | -1 | -0.02681500 | -2.13246500 | 4.81899400  |
| C  | -1 | -1.29440500 | -2.94728200 | 4.90316400  |
| C  | -1 | -2.37703700 | -2.37508900 | 5.49743300  |
| C  | -1 | -3.65798100 | -2.95226700 | 5.34581400  |
| C  | -1 | -3.83969900 | -4.07100800 | 4.56702800  |
| C  | -1 | -2.71195800 | -4.75947300 | 4.02906500  |
| C  | -1 | -1.41433300 | -4.20101900 | 4.22578800  |
| C  | -1 | -0.28422700 | -4.92799600 | 3.77402800  |
| C  | -1 | -0.42265800 | -6.13024800 | 3.17032200  |
| C  | -1 | -1.69719800 | -6.66787100 | 2.93195000  |
| C  | -1 | -2.81041600 | -6.00029900 | 3.34189000  |
| C  | -1 | -5.24320600 | -4.48110200 | 4.26126700  |
| Ni | -1 | 0.87124800  | -0.80369700 | -1.00336600 |
| Ni | -1 | -0.72482800 | 1.59145000  | -2.04038400 |
| Ni | -1 | -0.08495800 | 1.83414500  | 1.16115100  |
| O  | -1 | 2.10557600  | -1.76465400 | -4.07810500 |
| O  | -1 | 2.24036000  | -2.09817500 | -1.85071000 |
| O  | -1 | 7.70278900  | -5.81807700 | -4.93095000 |
| O  | -1 | 7.82875100  | -6.08276900 | -2.69207800 |
| O  | -1 | -0.63574100 | -2.53958700 | -3.30274200 |
| O  | -1 | -0.71645100 | -2.07677400 | -1.11243100 |
| O  | -1 | -6.60682400 | -5.44858300 | -3.82848400 |
| O  | -1 | -7.23193000 | -4.79810300 | -1.78145700 |
| O  | -1 | 0.76718400  | 3.01629700  | -1.96017800 |
| O  | -1 | 0.75380400  | 3.38671400  | 0.24477800  |
| O  | -1 | 6.03641400  | 7.63512700  | -2.14970100 |
| O  | -1 | 5.46137700  | 8.37623700  | -0.11414400 |
| O  | -1 | 0.60845400  | 0.24237600  | -2.73061400 |
| O  | -1 | -0.43318400 | 0.58276100  | -0.32186700 |
| O  | -1 | 0.12481000  | 3.06219200  | 2.95664800  |



|   |    |             |             |             |
|---|----|-------------|-------------|-------------|
| C | -1 | 2.65069300  | -2.22257500 | -3.03196800 |
| C | -1 | 3.90764500  | -3.03027100 | -3.22660800 |
| C | -1 | 4.00070400  | -4.24867400 | -2.58679800 |
| C | -1 | 5.12219600  | -5.07525500 | -2.75986200 |
| C | -1 | 6.15478100  | -4.67569800 | -3.56881500 |
| C | -1 | 6.12541700  | -3.40154900 | -4.21562200 |
| C | -1 | 4.97363200  | -2.56710900 | -4.04862500 |
| C | -1 | 4.97972500  | -1.29027200 | -4.66804200 |
| C | -1 | 6.04981800  | -0.85744100 | -5.39276800 |
| C | -1 | 7.17682000  | -1.67250800 | -5.54795700 |
| C | -1 | 7.21868000  | -2.91406400 | -4.97539800 |
| C | -1 | 7.32969900  | -5.61229200 | -3.75205800 |
| C | -1 | -1.13356700 | -2.64129300 | -2.14970300 |
| C | -1 | -2.40115700 | -3.45610900 | -2.06553400 |
| C | -1 | -3.48378900 | -2.88391600 | -1.47126500 |
| C | -1 | -4.76475400 | -3.46107800 | -1.62298000 |
| C | -1 | -4.94652700 | -4.57990000 | -2.40166300 |
| C | -1 | -3.81867000 | -5.26835900 | -2.93975600 |
| C | -1 | -2.52108500 | -4.70984600 | -2.74290900 |
| C | -1 | -1.39097900 | -5.43682300 | -3.19467000 |
| C | -1 | -1.52943200 | -6.63905800 | -3.79847200 |
| C | -1 | -2.80397200 | -7.17668200 | -4.03684400 |
| C | -1 | -3.91716800 | -6.50912600 | -3.62680800 |
| C | -1 | -6.34998000 | -4.98991300 | -2.70752700 |
| C | -1 | 1.08761600  | 3.66277400  | -0.92981200 |
| C | -1 | 2.00609200  | 4.85572300  | -1.08741300 |
| C | -1 | 3.04757400  | 4.74384100  | -1.96383800 |
| C | -1 | 4.05991100  | 5.72503600  | -1.99840300 |
| C | -1 | 4.01958300  | 6.81919600  | -1.16526900 |
| C | -1 | 2.89185800  | 7.02142900  | -0.30113600 |
| C | -1 | 1.87221900  | 6.01923300  | -0.27423500 |
| C | -1 | 0.71462100  | 6.24753500  | 0.51982000  |
| C | -1 | 0.56295200  | 7.40455600  | 1.22407500  |
| C | -1 | 1.56788800  | 8.38198300  | 1.20768100  |
| C | -1 | 2.70119400  | 8.19431600  | 0.46803700  |
| C | -1 | 5.24170800  | 7.68889500  | -1.13066100 |
| O | -1 | -0.98201800 | 2.55330000  | -4.01204400 |
| O | -1 | -7.67810700 | 6.93617600  | -0.38504000 |
| O | -1 | -7.54324700 | 6.60271800  | 1.84234800  |
| O | -1 | -2.08081800 | 2.88281600  | -1.23789100 |
| O | -1 | -1.95479500 | 2.61805000  | 1.00095400  |
| C | -1 | -7.13299000 | 6.47825500  | 0.66109700  |
| C | -1 | -5.87603800 | 5.67055800  | 0.46645700  |
| C | -1 | -5.78297900 | 4.45215600  | 1.10626700  |
| C | -1 | -4.66148800 | 3.62557500  | 0.93320200  |
| C | -1 | -3.62882600 | 4.02519600  | 0.12424300  |
| C | -1 | -3.65826700 | 5.29928000  | -0.52255700 |
| C | -1 | -4.81005200 | 6.13372000  | -0.35556000 |
| C | -1 | -4.80388200 | 7.41062200  | -0.97498400 |
| C | -1 | -3.73386600 | 7.84338800  | -1.69970400 |
| C | -1 | -2.60686400 | 7.02832200  | -1.85489200 |
| C | -1 | -2.56492700 | 5.78683000  | -1.28233900 |
| C | -1 | -2.45398400 | 3.08853800  | -0.05899400 |
| H | -1 | -8.47845500 | 7.41016200  | -0.14759300 |
| H | -1 | -8.99373200 | -3.50106800 | -5.02241300 |
| H | -1 | -8.09639900 | -5.06478600 | -2.10266300 |
| H | -1 | -7.88688800 | -2.99222200 | 1.94622100  |
| H | -1 | -6.98962500 | -4.55597500 | 4.86613100  |
| H | -1 | 6.79816800  | 8.19752700  | -1.99147200 |
| H | -1 | 7.71970700  | 6.47727200  | 1.05018600  |

|   |    |             |             |             |
|---|----|-------------|-------------|-------------|
| H | -1 | 8.57141700  | -6.64983000 | -2.91228100 |
| H | -1 | 9.67830900  | -6.14089400 | 4.05649300  |
| H | -1 | 0.69457400  | -4.51868700 | 3.91300400  |
| H | -1 | 0.44744700  | -6.67668600 | 2.87162200  |
| H | -1 | -0.65933300 | -7.18546800 | -4.09724100 |
| H | -1 | -0.41217100 | -5.02755300 | -3.05562800 |
| H | -1 | -3.77602600 | -6.41644600 | 3.14360100  |
| H | -1 | -1.79405900 | -7.60580800 | 2.42619100  |
| H | -1 | -2.90085000 | -8.11458300 | -4.54266600 |
| H | -1 | -4.88278800 | -6.92531300 | -3.82496500 |
| H | -1 | -3.36466500 | -1.99493500 | -0.88780800 |
| H | -1 | -5.60412000 | -3.02186600 | -1.12552900 |
| H | -1 | -3.33627600 | -2.02335500 | -5.22236400 |
| H | -1 | -5.57562900 | -3.05040900 | -5.46006400 |
| H | -1 | -8.52806300 | -0.01775400 | -3.29229700 |
| H | -1 | -8.28107400 | 2.14017800  | -2.25059400 |
| H | -1 | -6.03940400 | 3.06935100  | -1.80529000 |
| H | -1 | -4.05752200 | 1.88008000  | -2.52267600 |
| H | -1 | -2.22941200 | -1.51444600 | 1.74641600  |
| H | -1 | -4.46874900 | -2.54152100 | 1.50869900  |
| H | -1 | -7.42129300 | 0.49103100  | 3.67659600  |
| H | -1 | -7.17425300 | 2.64911600  | 4.71798900  |
| H | -1 | -4.93273100 | 3.57825400  | 5.16343800  |
| H | -1 | -2.95076900 | 2.38893200  | 4.44596800  |
| H | -1 | -2.25791100 | -1.48606900 | 6.08083100  |
| H | -1 | -4.49732800 | -2.51316000 | 5.84338900  |
| H | -1 | 4.12597000  | -0.65375700 | -4.56388200 |
| H | -1 | 6.02809200  | 0.11162300  | -5.84591500 |
| H | -1 | 8.01148800  | -1.32207000 | -6.11841500 |
| H | -1 | 8.08770300  | -3.52523500 | -5.10255500 |
| H | -1 | 5.17134300  | -6.01959800 | -2.25916100 |
| H | -1 | 3.20464600  | -4.56928600 | -1.94773700 |
| H | -1 | 7.13485400  | 0.62042900  | 1.12273600  |
| H | -1 | 9.11817900  | -0.81312200 | 0.85033800  |
| H | -1 | 9.19445900  | -3.01639500 | 1.86610800  |
| H | -1 | 5.23268000  | -0.14483400 | 2.40487500  |
| H | -1 | 6.27805200  | -5.51065900 | 4.70976000  |
| H | -1 | 4.31135200  | -4.06047800 | 5.02089400  |
| H | -1 | 4.87369000  | 5.61666200  | -2.68463800 |
| H | -1 | 3.09571200  | 3.90656400  | -2.62833100 |
| H | -1 | 3.45973300  | 8.94897700  | 0.47025300  |
| H | -1 | 1.44668200  | 9.27957200  | 1.77736800  |
| H | -1 | -0.32848400 | 7.56788400  | 1.79290400  |
| H | -1 | -0.04903300 | 5.49941300  | 0.56505000  |
| H | -1 | 7.98893500  | 3.24571100  | -1.22619000 |
| H | -1 | 8.26851000  | 1.17711800  | -2.45379000 |
| H | -1 | 6.49331500  | -0.53453300 | -2.43831100 |
| H | -1 | 4.48026400  | -0.20393900 | -1.13119700 |
| H | -1 | 4.84423700  | 4.83848300  | 1.96737300  |
| H | -1 | 3.06637400  | 3.12825400  | 2.02368400  |
| H | -1 | -6.57903700 | 4.13154400  | 1.74532800  |
| H | -1 | -4.61235300 | 2.68121100  | 1.43386500  |
| H | -1 | -1.69585900 | 5.17571300  | -1.40944900 |
| H | -1 | -1.77222400 | 7.37876500  | -2.42538800 |
| H | -1 | -3.75560000 | 8.81243600  | -2.15288700 |
| H | -1 | -5.65759200 | 8.04719100  | -0.87077500 |
| H | -1 | -1.79548100 | 3.05911600  | -3.94856800 |
| H | -1 | -0.18971900 | 3.07783100  | -4.14890000 |
| H | -1 | -0.68861400 | 3.56807000  | 3.02011400  |
| H | -1 | 0.91713800  | 3.58667800  | 2.81978700  |

|   |    |             |             |             |
|---|----|-------------|-------------|-------------|
| H | -1 | 1.34760300  | 1.61643500  | 4.04301100  |
| H | -1 | -1.18415000 | 0.10110100  | 0.03260900  |
| H | -1 | 1.41584000  | 0.63718900  | -3.06803200 |
| H | -1 | 0.12525000  | -1.95515000 | -3.27232500 |
| H | -1 | 0.27592000  | -0.29062900 | -3.45651200 |
| H | -1 | 1.31519200  | 0.40706900  | 5.04000800  |
| H | -1 | -0.28656700 | 1.09614600  | 4.51198300  |

Total Electronic Energy = -7922.535425 (Hartree/Particle).

**Table S11** DFT-optimized geometry of CO<sub>2</sub> (singlet), computed at the B3LYP-D3/ 6-31+G\*\* (CO) level in the absence of any solvent.

| Atom | x          | y          | z           |
|------|------------|------------|-------------|
| C    | 0.00000000 | 0.00000000 | 0.00000000  |
| O    | 0.00000000 | 0.00000000 | 1.16949000  |
| O    | 0.00000000 | 0.00000000 | -1.16949000 |

Total Electronic Energy = -188.590582 (Hartree/Particle).

**Table S12** DFT-optimized geometry of C<sub>2</sub>H<sub>2</sub> (singlet), computed at the B3LYP-D3/ 6-31+G\*\* (HC) level in the absence of any solvent.

| Atom | x          | y          | z           |
|------|------------|------------|-------------|
| C    | 0.00000000 | 0.00000000 | 0.60412800  |
| H    | 0.00000000 | 0.00000000 | 1.67085600  |
| C    | 0.00000000 | 0.00000000 | -0.60412800 |
| H    | 0.00000000 | 0.00000000 | -1.67085600 |

Total Electronic Energy = -77.337459 (Hartree/Particle).

### Heat of adsorption

The virial expression of the following type has been used to fit the combined single component isotherm at 273 and 298 K.

$$\ln(P) = \ln(A) + \frac{1}{T} \sum_{i=0}^m a_i A^i + \sum_{i=0}^n b_i A^i \quad (\text{eq. 6})$$

P is the pressure expressed in torr, A is the amount adsorbed in mmol/g, T is the temperature in K, a<sub>i</sub> and b<sub>i</sub> are virial coefficients, and m, n represents the number of coefficients required to

adequately describe the isotherms (eq. 6). The value of  $m$  and  $n$  was gradually increased until the contribution of extra added  $a$  and  $b$  coefficients were negligible towards the final fit. The values of the virial coefficient  $a_i$  were taken to calculate the isosteric heat of adsorption using the following expression.

$$Q_{st} = -R \sum_{i=0}^m a_i A^i + \sum_{i=0}^n b_i A^i \quad (\text{eq. 7})$$

$Q_{st}$  is the coverage dependent isosteric heat of adsorption and  $R$  is the universal gas constant.

### IAST selectivity

The Langmuir fitting is the simplest model to fit isotherms while DSLF or dual-site Langmuir-Freundlich fit the adsorption isotherm more exclusively judged by goodness-of-fit factors. While multiple factors or sites are present between adsorbate-adsorbent integration with wide loading pressure DSLF works for exclusively for data fitting. DSLF can be expressed as follows;

$$n = \frac{a \cdot b \cdot p^c}{1 + b p^c} + \frac{a_1 \cdot b_1 \cdot p^{c_1}}{1 + b_1 p^{c_1}} \quad (\text{Eqn.R1})$$

where  $n$  is the amount adsorbed (the loading) in  $\text{mmol g}^{-1}$ ,  $p$  the pressure in torr,  $a$  is the maximal loading in  $\text{mmol g}^{-1}$ ,  $b$  the affinity constant and  $c$  the heterogeneity exponent the product of  $b \cdot p^c$  must be dimension-less. We note that in the equation also takes the form with  $(b \cdot p)^c$ , then  $b$  would have simply the unit  $1/\text{torr}$ .

The value as obtained from this equation were finally fitted by MATLAB, for the calculation of selectivity.

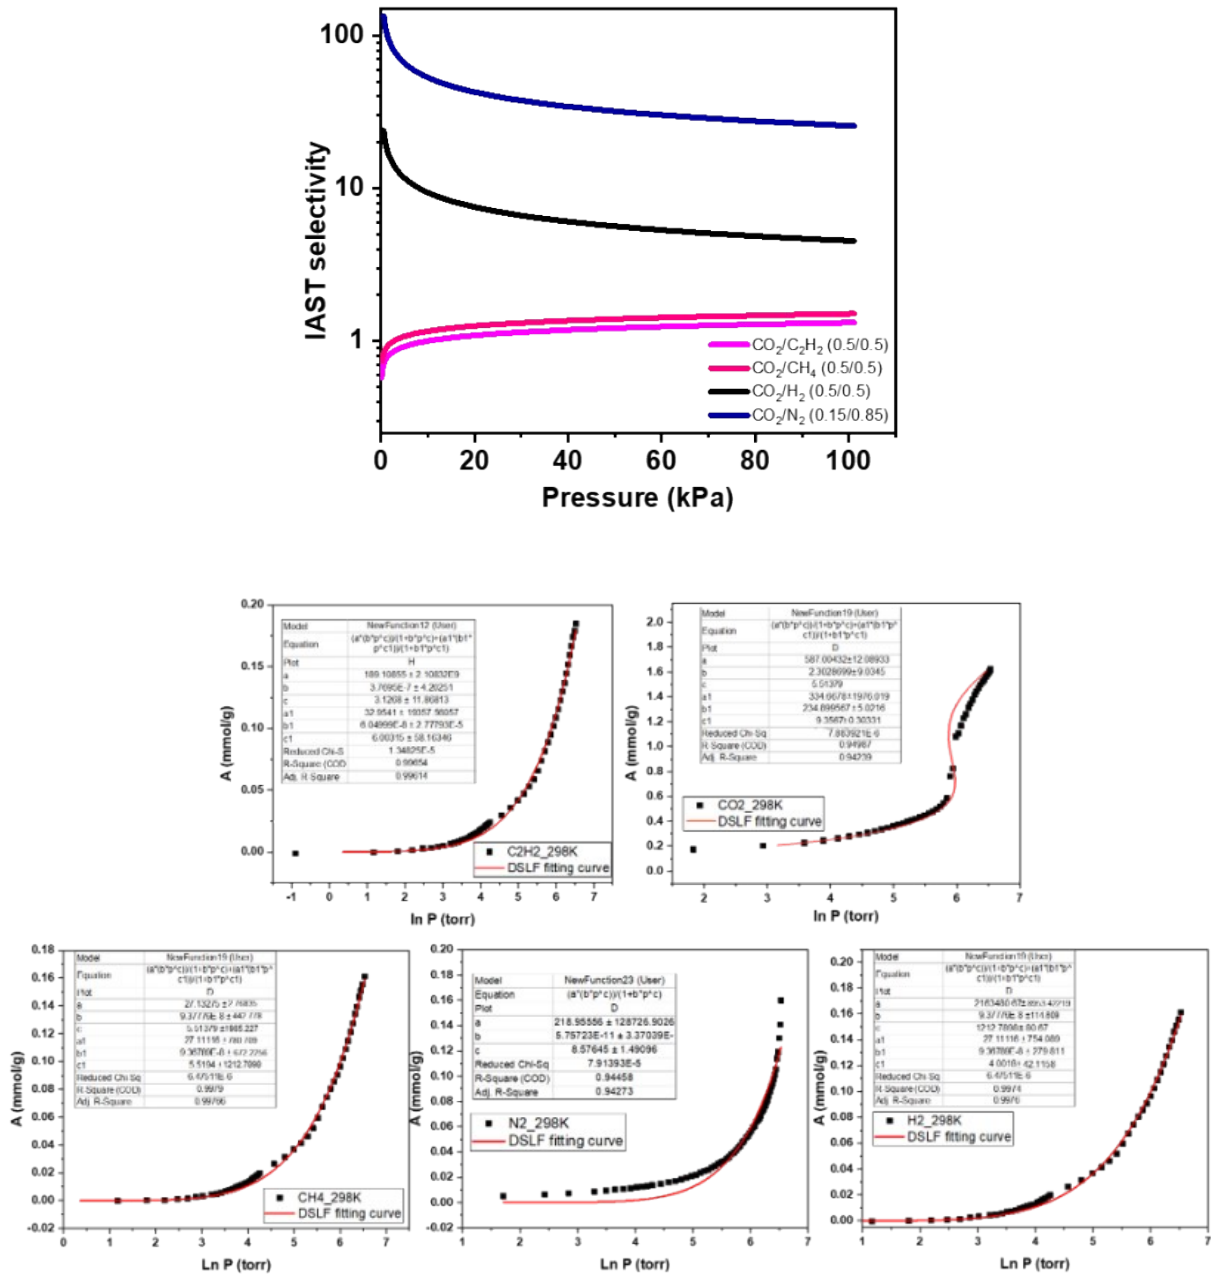

**Figure S11** The IAST selectivity curve (top) with DSLF fitting (bottom) for C<sub>2</sub>H<sub>2</sub>, CO<sub>2</sub>, CH<sub>4</sub>, N<sub>2</sub> and H<sub>2</sub> adsorption isotherm measured at 298 K.

## Dynamic breakthrough separation experiments

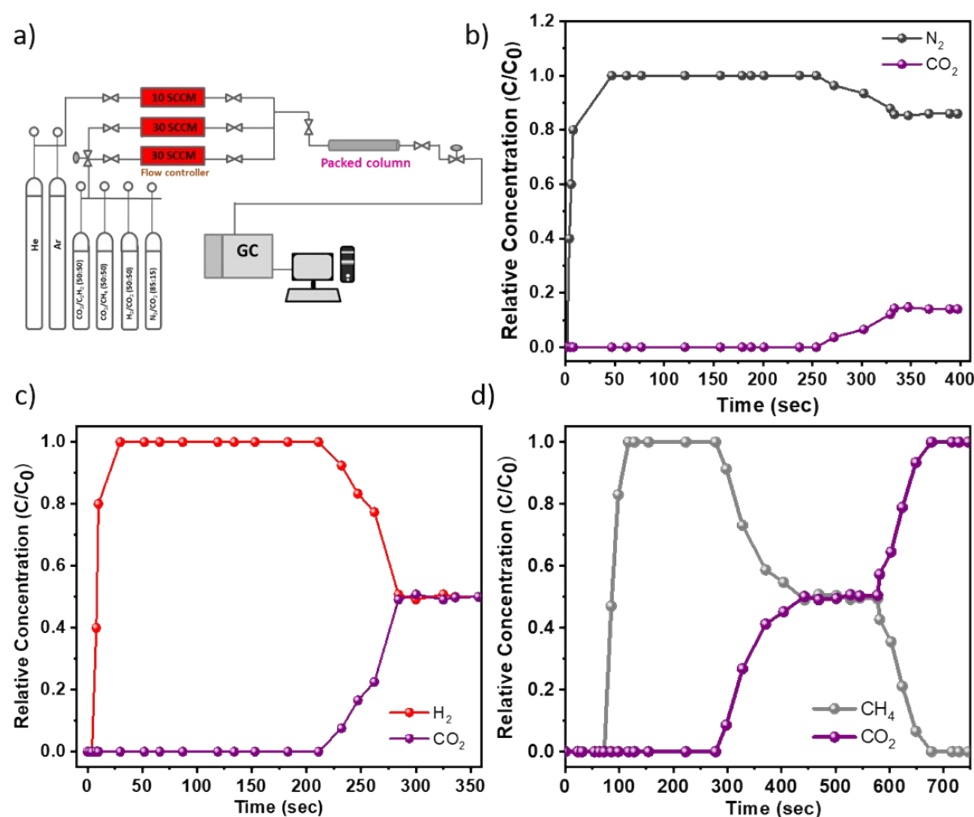

**Figure S12** (a) Schematic representation of assembled breakthrough gas separation assembly. (b) Experimental dynamic breakthrough separation under ambient condition.

The real-time adsorption-based separation and purification process of **1'** for CO<sub>2</sub>/H<sub>2</sub> (1:1, v/v), CO<sub>2</sub>/N<sub>2</sub> (0.85/0.15, v/v), CO<sub>2</sub>/CH<sub>4</sub> (1:1, v/v) and CO<sub>2</sub>/C<sub>2</sub>H<sub>2</sub> (1:1, v/v) gas mixture was analyzed by using packed column of 12.4 cm (~1.65 g of powdered **1**) length and 0.3 cm diameter. The sample was first activated at 195 °C for 12 h prior to loading in column and after loading it was further regenerated by the continuous flowing of carrier gas for 1 h. The continuous flow was regulated by mass flow controller by using Helium as a carrier gas for CO<sub>2</sub>/N<sub>2</sub>, CO<sub>2</sub>/CH<sub>4</sub> and CO<sub>2</sub>/C<sub>2</sub>H<sub>2</sub> and Ar gas for CO<sub>2</sub>/H<sub>2</sub>, respectively. For CO<sub>2</sub>/N<sub>2</sub> and CO<sub>2</sub>/H<sub>2</sub> dynamic breakthrough separation was performed and for other hydrocarbon mixtures, stepwise dynamic breakthrough separations were performed to exclusively separate each isomer with polymer grade purity and consecutive sample regeneration (Table S6).

The bi-cyclic C<sub>2</sub>H<sub>2</sub>/CO<sub>2</sub> breakthrough separation data has been plotted in Figure 6 and this data is given in the main manuscript. The data ensures reproducibility and recyclability of the separation process while in between 1<sup>st</sup> and 2<sup>nd</sup> cycle the material is activated by blowing He gas through the column further

initiated the gas mixture flow by keeping other parameters (temp, flow rate, hold time, etc.) same. The C<sub>2</sub>H<sub>2</sub> elution and detection quantity through gas chromatography has been analysed by calibrating the outlet gas concentration through the experimentally calibrated (~3000, ~500, ~200 ppm) cylinders.

**Table S13** The total flow rate and corresponding breakthrough times are as follows;

| Experimental dynamic breakthrough details. Feed gas mixture (A: B) | Conc. (A: B) | Flow rate (total) in mL.min <sup>-1</sup> | Carrier gas | Outlet time (for gas A) in sec | Outlet time for (gas B) in sec |
|--------------------------------------------------------------------|--------------|-------------------------------------------|-------------|--------------------------------|--------------------------------|
| H <sub>2</sub> /CO <sub>2</sub>                                    | (0.5:0.5)    | 2.2                                       | Ar          | 8                              | 232                            |
| N <sub>2</sub> /CO <sub>2</sub>                                    | (0.85:0.15)  | 2.2                                       | He          | 4                              | 272                            |
| CO <sub>2</sub> /CH <sub>4</sub>                                   | (0.5:0.5)    | 2.8                                       | He          | 85                             | 298                            |
| CO <sub>2</sub> /C <sub>2</sub> H <sub>2</sub>                     | (0.5:0.5)    | 2.8                                       | He          | 98                             | 345                            |

## References

- (1) SMART (V 5.628), SAINT (V 6.45a), XPREP, SHELXTL; Bruker AXS Inc. Madison, Wisconsin, USA. **2004**.
- (2) Sheldrick, G. M. Siemens Area Detector Absorption Correction Program, University of Göttingen, Göttingen, Germany. **1994**.
- (3) Altomare, A.; Cascarano, G.; Giacovazzo, C.; Guagliardi, A. Completion and refinement of crystal structures with SIR92. *Journal of Applied Crystallography* **1993**, 26 (3), 343.
- (4) Sheldrick, G. M. SHELXL-97, Program for Crystal Structure Solution and Refinement; University of Göttingen, Göttingen, Germany. **1997**.
- (5) Sheldrick, G. M. SHELXS 97, Program for the Solution of Crystal Structure, University Göttingen, Germany. **1997**.
- (6) Spek, A. Single-crystal structure validation with the program PLATON. *Journal of Applied Crystallography* **2003**, 36 (1), 7.
- (7) Suzuki, M.; Suzuki, M. *Adsorption engineering*; Kodansha Tokyo, 1990.
- (8) Yang, R. T. *Gas separation by adsorption processes*; World Scientific, 1997.
- (9) Yang, L.; Qian, S.; Wang, X.; Cui, X.; Chen, B.; Xing, H. Energy-efficient separation alternatives: metal–organic frameworks and membranes for hydrocarbon separation. *Chemical Society Reviews* **2020**, 49 (15), 5359.
- (10) Li, J.-R.; Kuppler, R. J.; Zhou, H.-C. Selective gas adsorption and separation in metal–organic frameworks. *Chemical Society Reviews* **2009**, 38 (5), 1477.
- (11) Chong, M. W. S.; Argent, S. P.; Moreau, F.; Trenholme, W. J. F.; Morris, C. G.; Lewis, W.; Easun, T. L.; Schröder, M. A Coordination Network Featuring Two Distinct Copper(II) Coordination Environments for Highly Selective Acetylene Adsorption. **2022**, 28 (52), e202201188.

- (12) Frisch, M.; Trucks, G.; Schlegel, H.; Scuseria, G.; Robb, M.; Cheeseman, J.; Scalmani, G.; Barone, V.; Petersson, G.; Nakatsuji, H. J. G. S. T. i. n. c. r. f. t. r. Gaussian 16, Revision C. 01. Gaussian, Inc., Wallingford CT. 2016. **2016**.
- (13) Lee, C.; Yang, W.; Parr, R. G. Development of the Colle-Salvetti correlation-energy formula into a functional of the electron density. *Physical Review B* **1988**, *37* (2), 785.
- (14) Becke, A. D. A new mixing of Hartree–Fock and local density-functional theories. *The Journal of Chemical Physics* **1993**, *98* (2), 1372.
- (15) Miehlich, B.; Savin, A.; Stoll, H.; Preuss, H. Results obtained with the correlation energy density functionals of Becke and Lee, Yang and Parr. *Chemical Physics Letters* **1989**, *157* (3), 200.
- (16) Ditchfield, R.; Hehre, W. J.; Pople, J. A. Self-Consistent Molecular-Orbital Methods. IX. An Extended Gaussian-Type Basis for Molecular-Orbital Studies of Organic Molecules. *The Journal of Chemical Physics* **1971**, *54* (2), 724.
- (17) Hehre, W. J.; Ditchfield, R.; Pople, J. A. Self—Consistent Molecular Orbital Methods. XII. Further Extensions of Gaussian—Type Basis Sets for Use in Molecular Orbital Studies of Organic Molecules. *The Journal of Chemical Physics* **1972**, *56* (5), 2257.
- (18) Hariharan, P. C.; Pople, J. A. The influence of polarization functions on molecular orbital hydrogenation energies. *Theoretica chimica acta* **1973**, *28* (3), 213.
- (19) Hay, P. J.; Wadt, W. R. Ab initio effective core potentials for molecular calculations. Potentials for the transition metal atoms Sc to Hg. *The Journal of Chemical Physics* **1985**, *82* (1), 270.
- (20) Wadt, W. R.; Hay, P. J. Ab initio effective core potentials for molecular calculations. Potentials for main group elements Na to Bi. *The Journal of Chemical Physics* **1985**, *82* (1), 284.
- (21) Hay, P. J.; Wadt, W. R. Ab initio effective core potentials for molecular calculations. Potentials for K to Au including the outermost core orbitals. *The Journal of Chemical Physics* **1985**, *82* (1), 299.
- (22) Grimme, S. Accurate description of van der Waals complexes by density functional theory including empirical corrections. **2004**, *25* (12), 1463.
- (23) Grimme, S. Semiempirical GGA-type density functional constructed with a long-range dispersion correction. **2006**, *27* (15), 1787.
- (24) Grimme, S.; Antony, J.; Ehrlich, S.; Krieg, H. A consistent and accurate ab initio parametrization of density functional dispersion correction (DFT-D) for the 94 elements H–Pu. *The Journal of Chemical Physics* **2010**, *132* (15).
